# Supplementary material for: Disentangling the effects of a century of eutrophication and climate warming on freshwater lake fish assemblages
Source: PubMed Central journal article supplement (PMC5544199; doi:10.1371/journal.pone.0182667), 2017-08-04

GSF

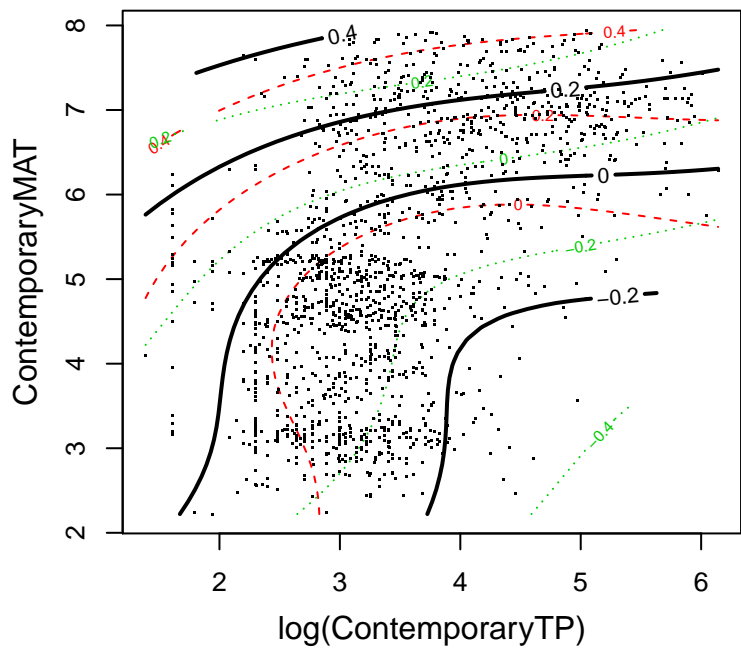

GSF

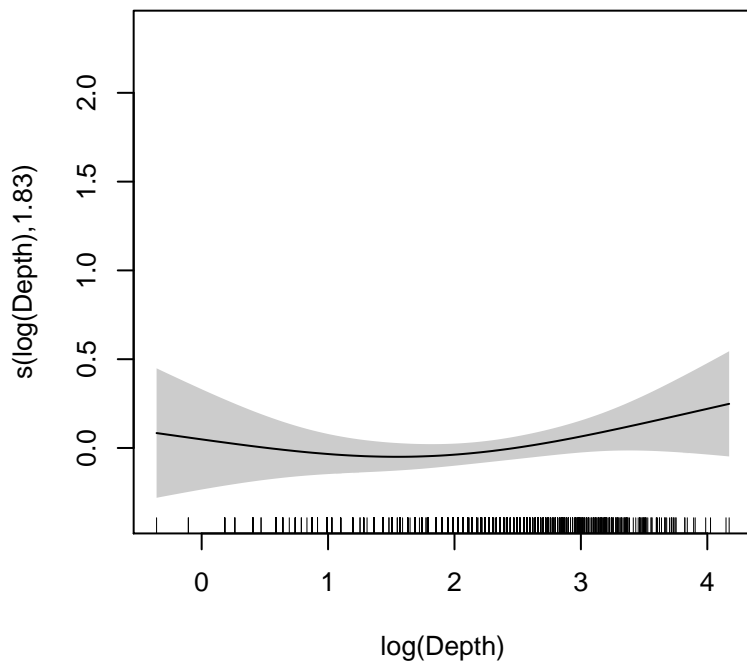

GSF

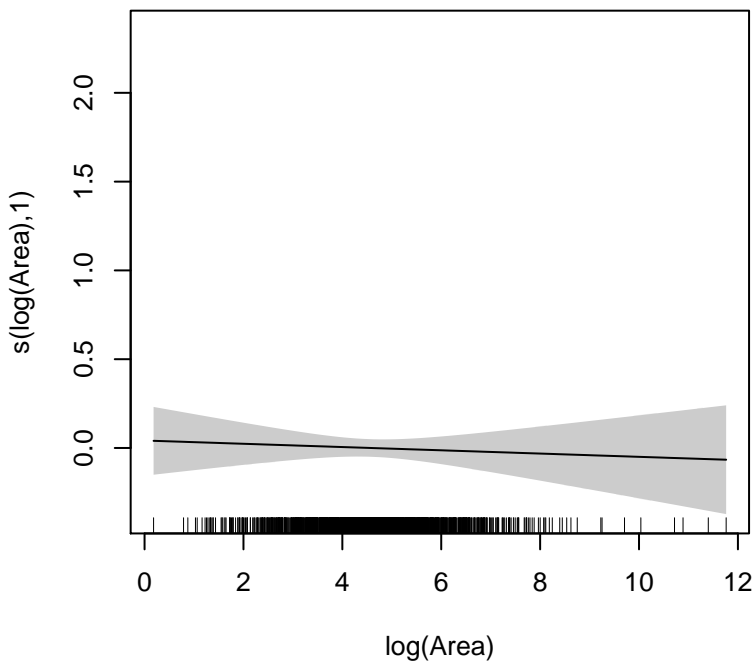

GSF

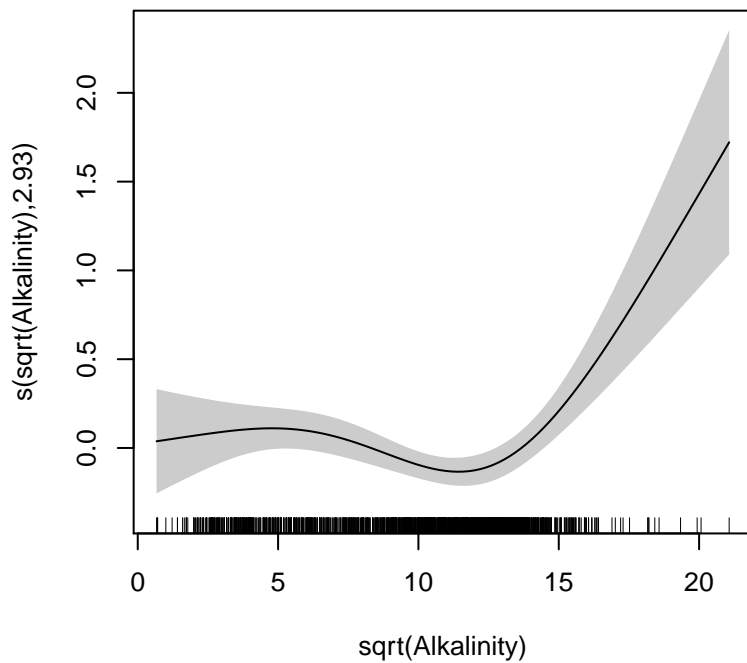

YEB

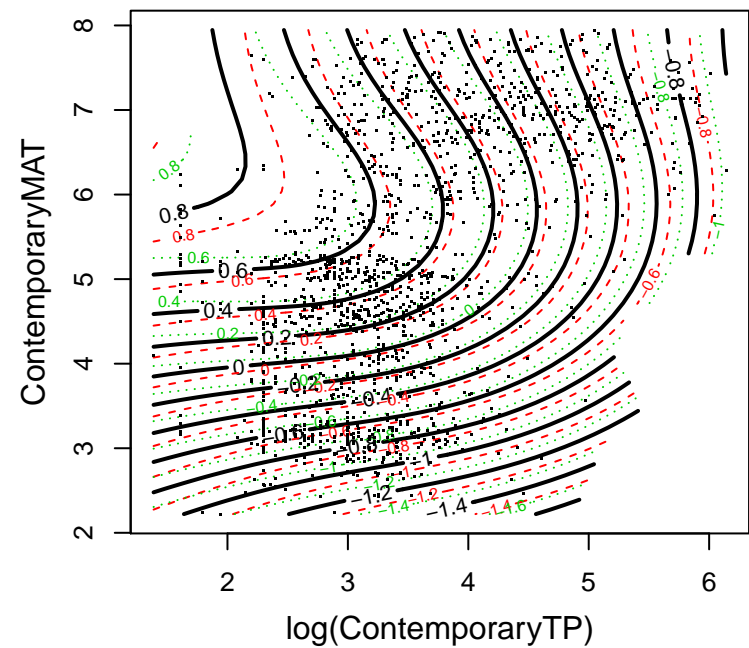

YEB

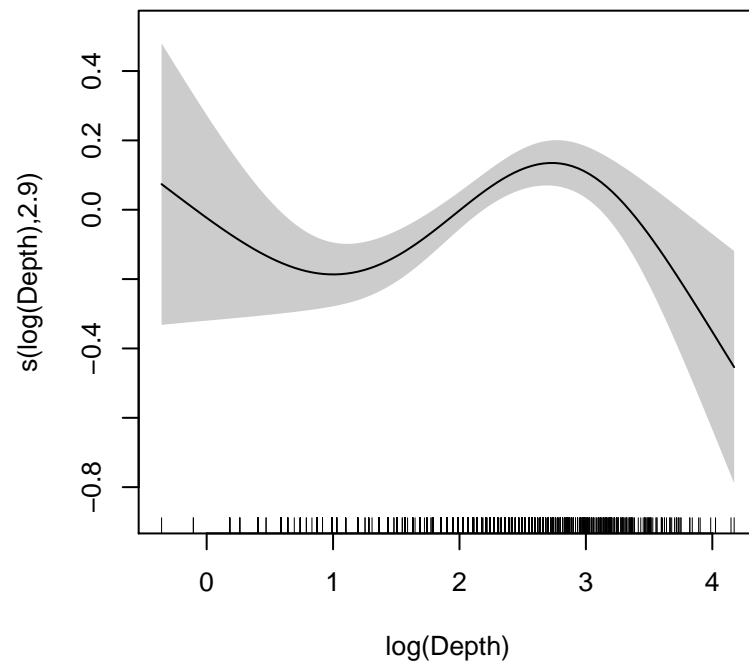

YEB

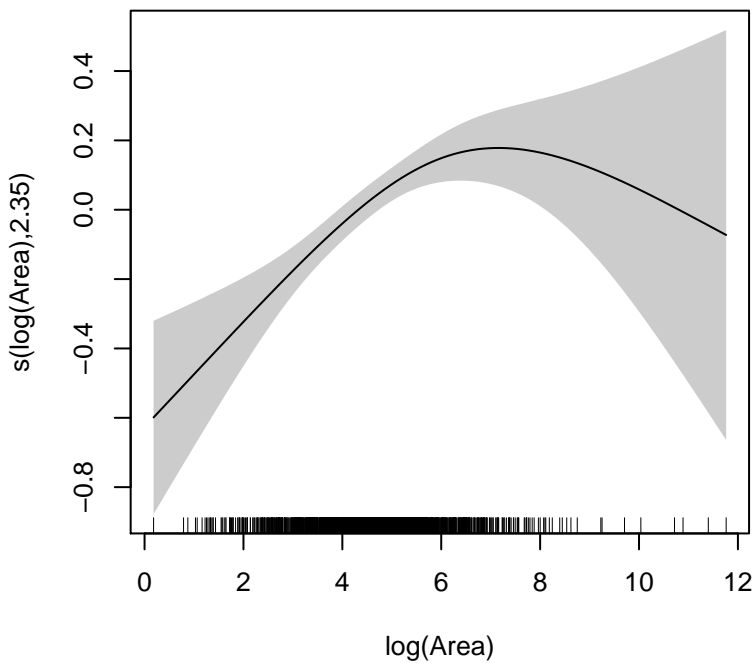

YEB

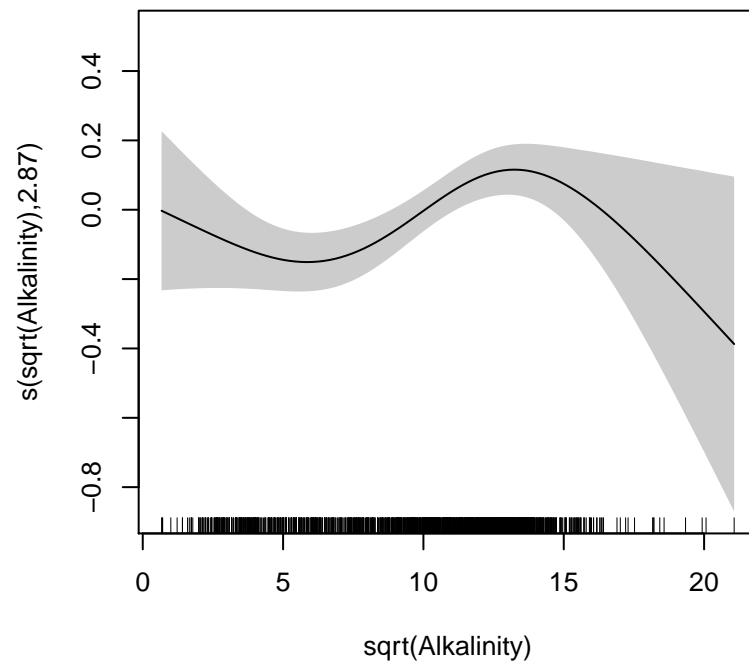

**WHB**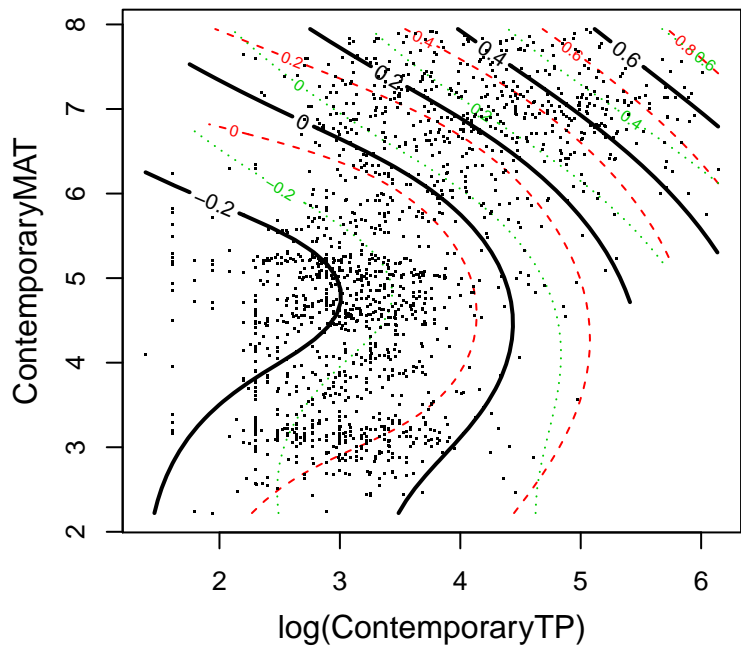**WHB**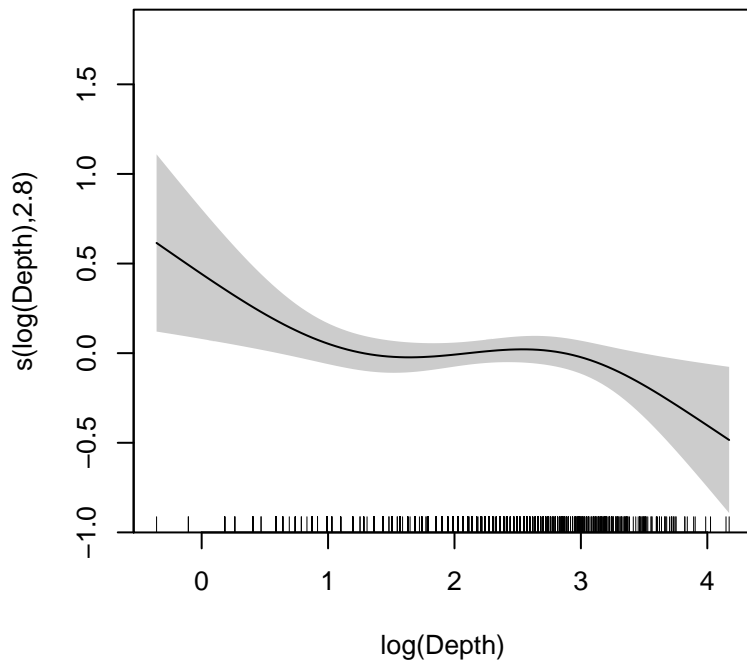**WHB**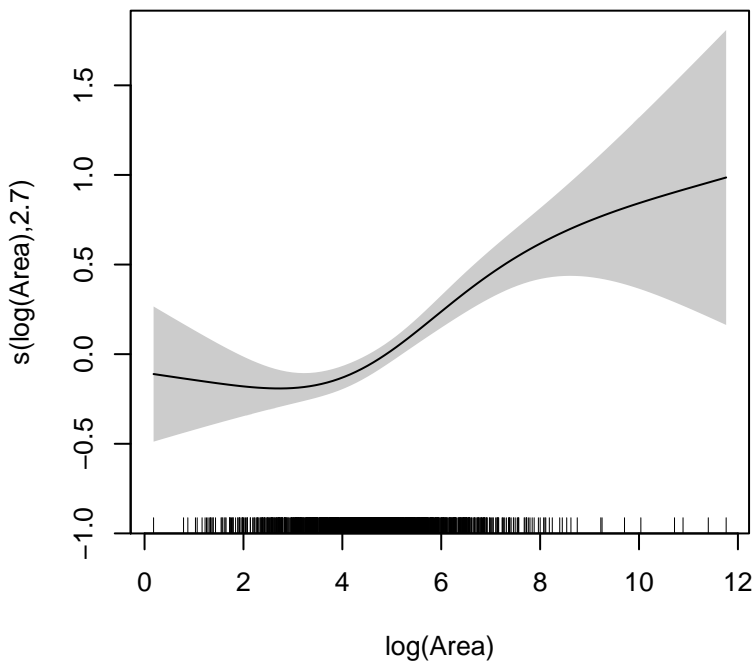**WHB**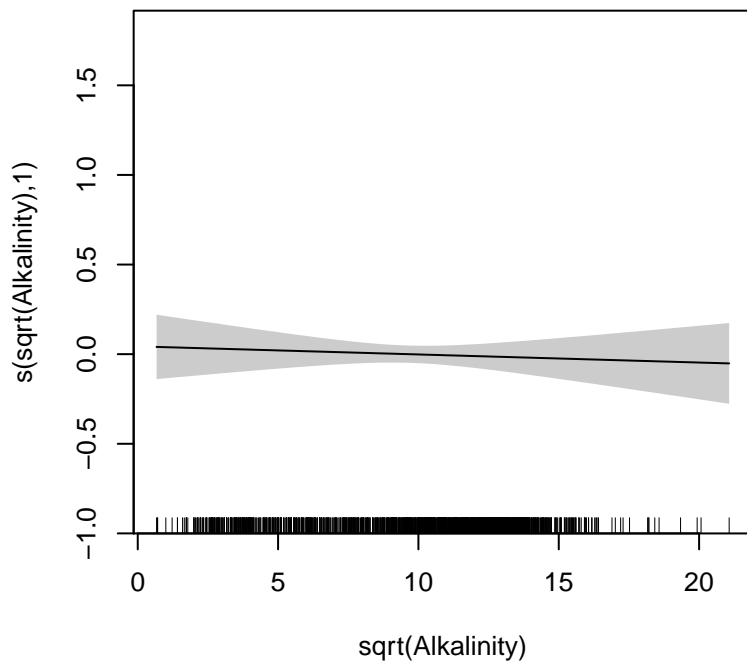

FRD

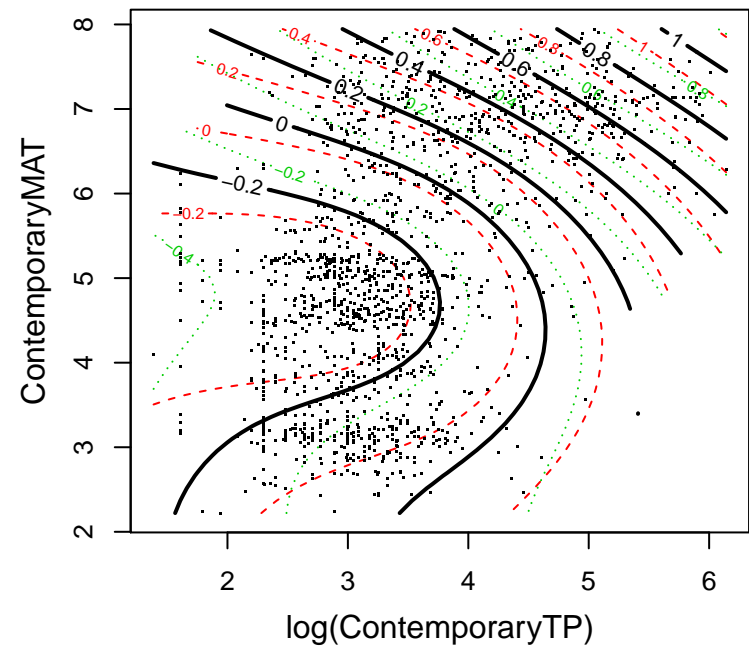

FRD

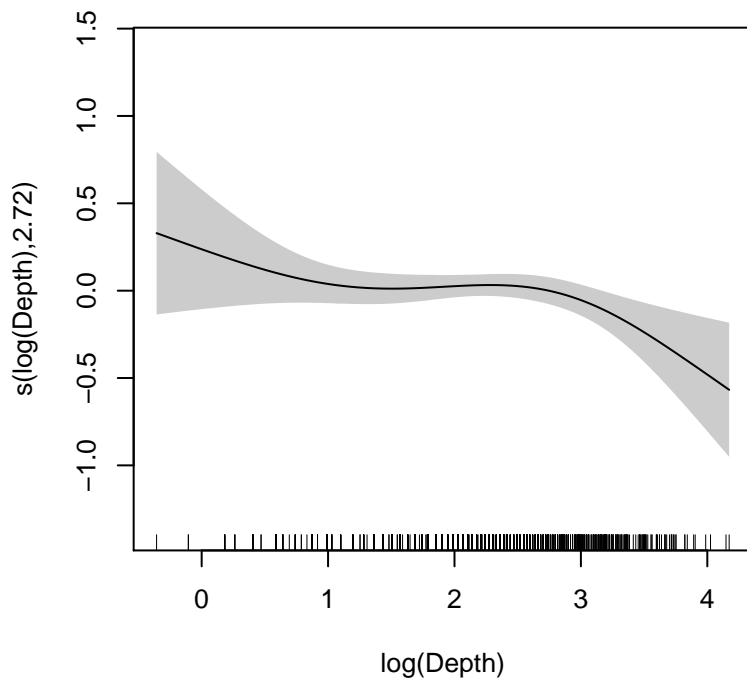

FRD

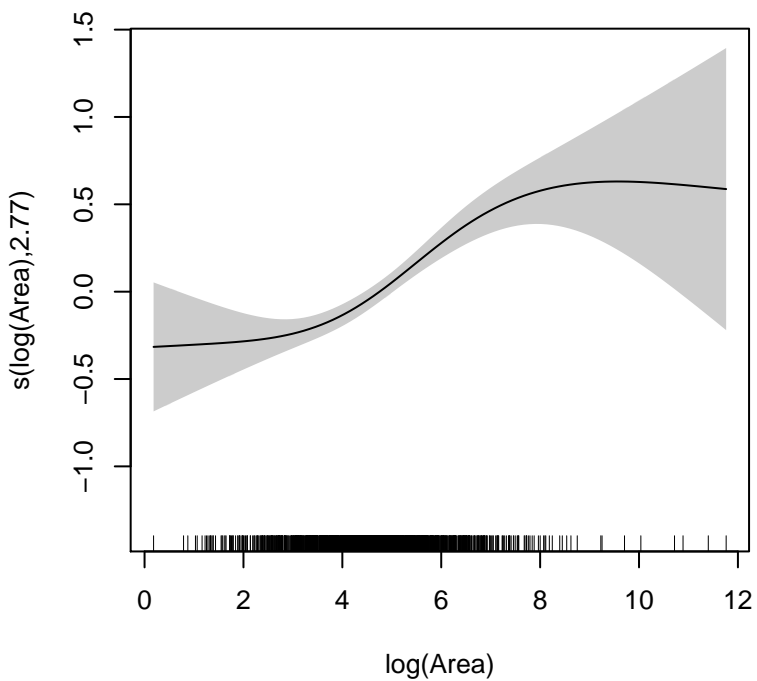

FRD

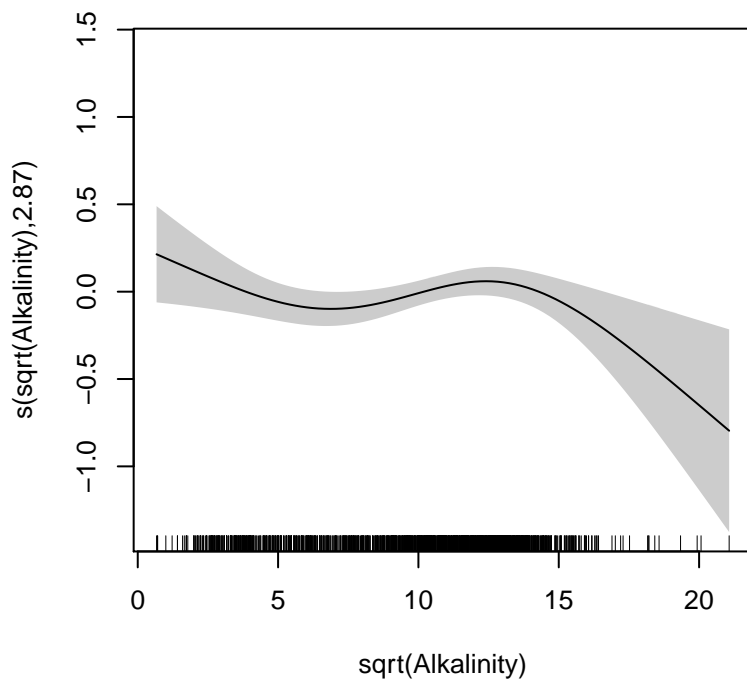

CAP

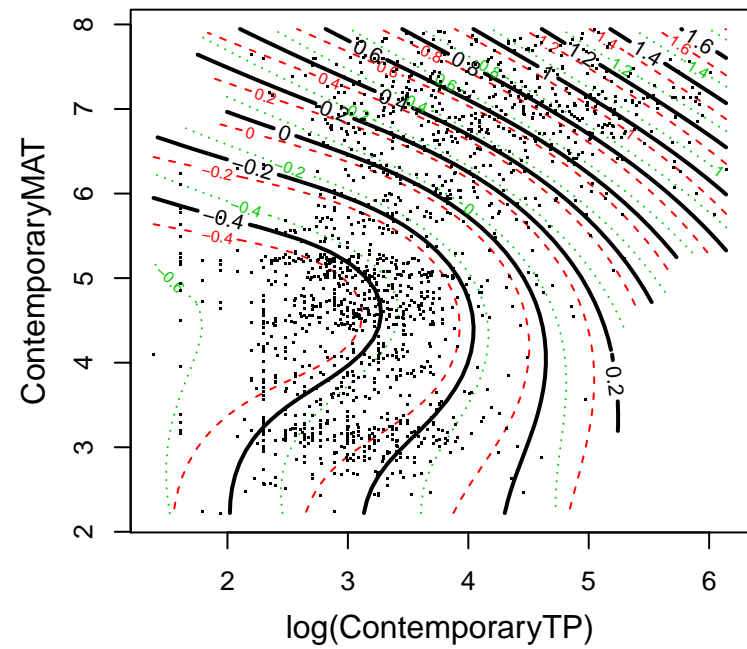

CAP

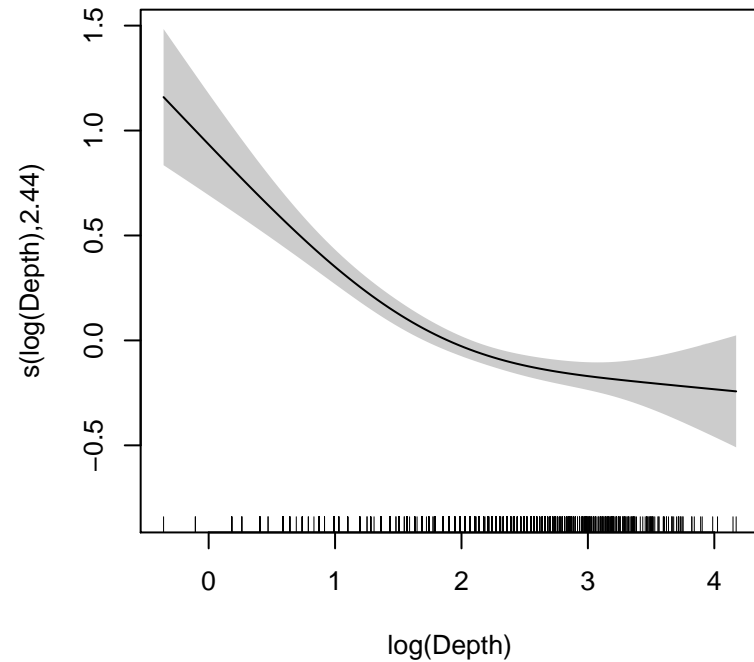

CAP

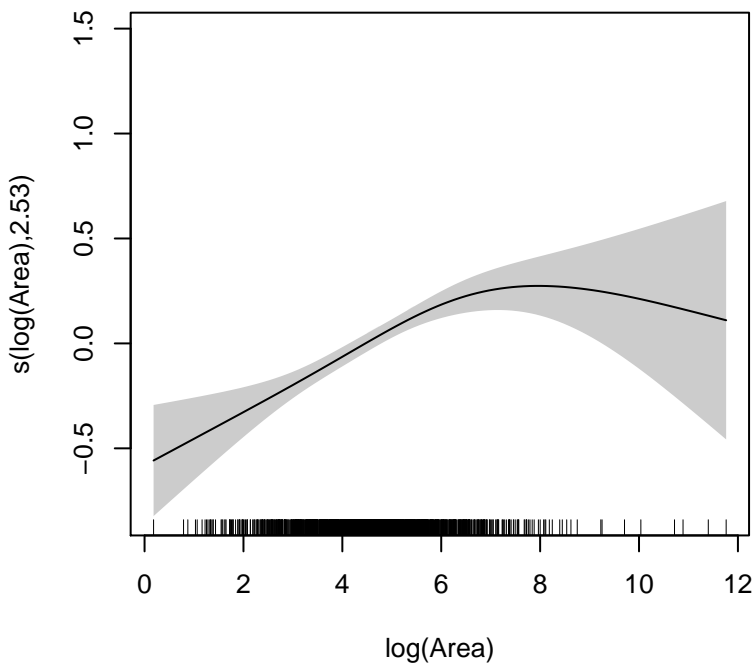

CAP

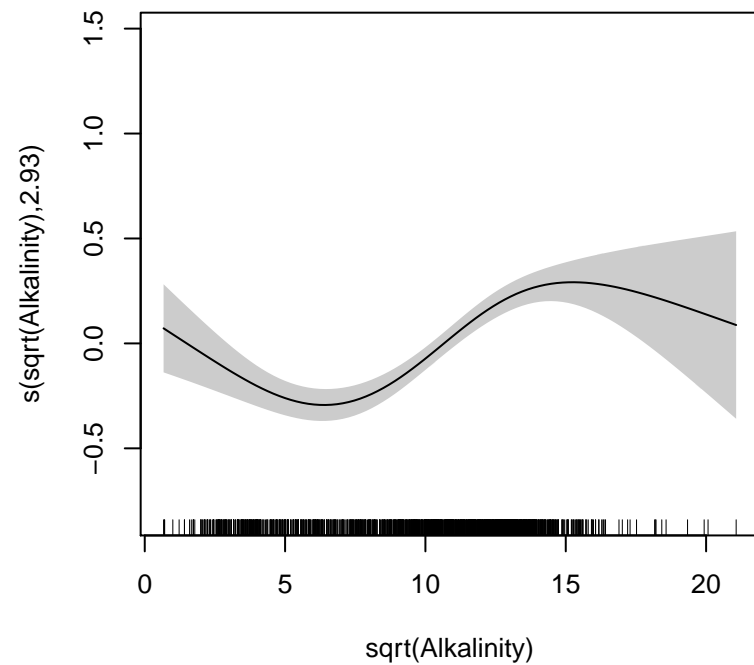

**BLG**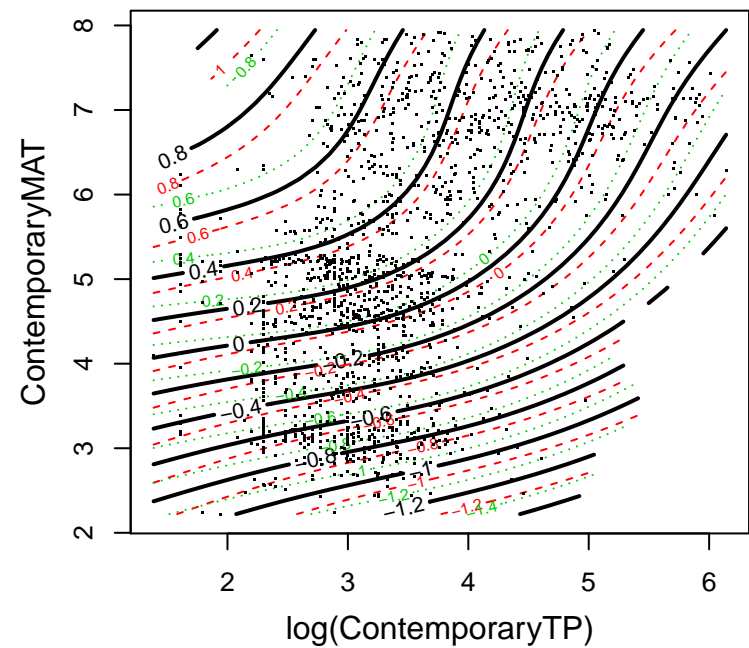**BLG**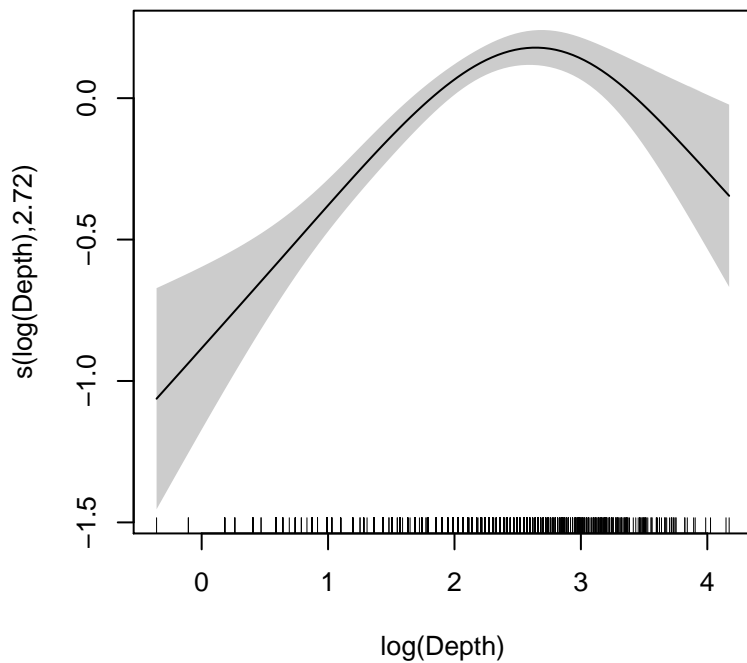**BLG**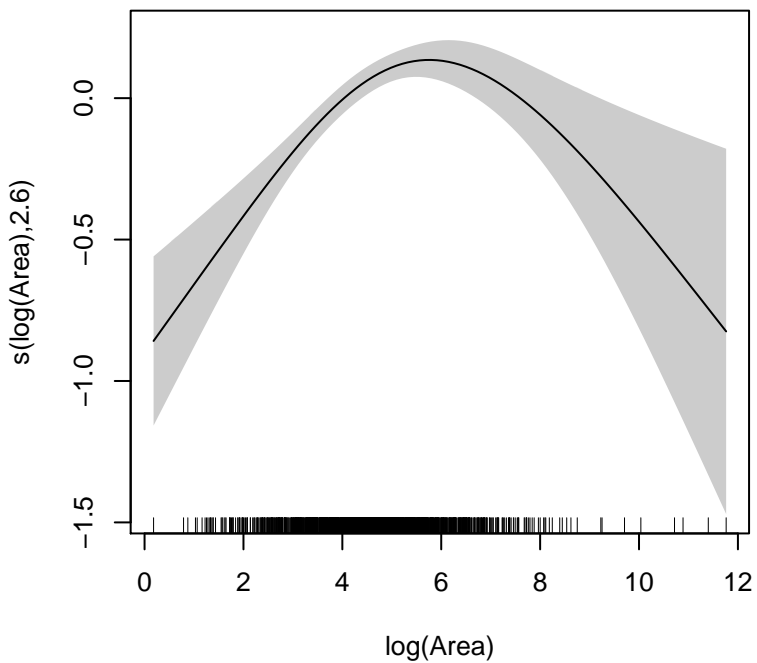**BLG**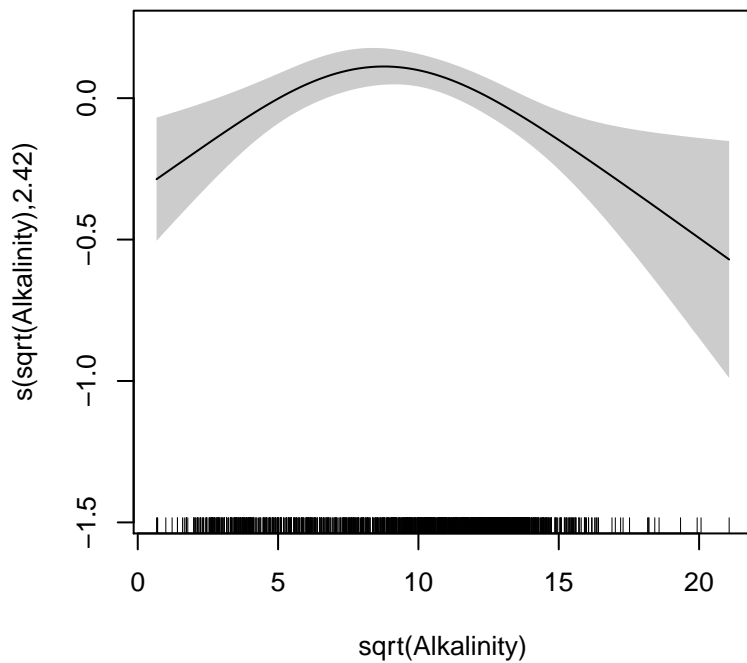

PMK

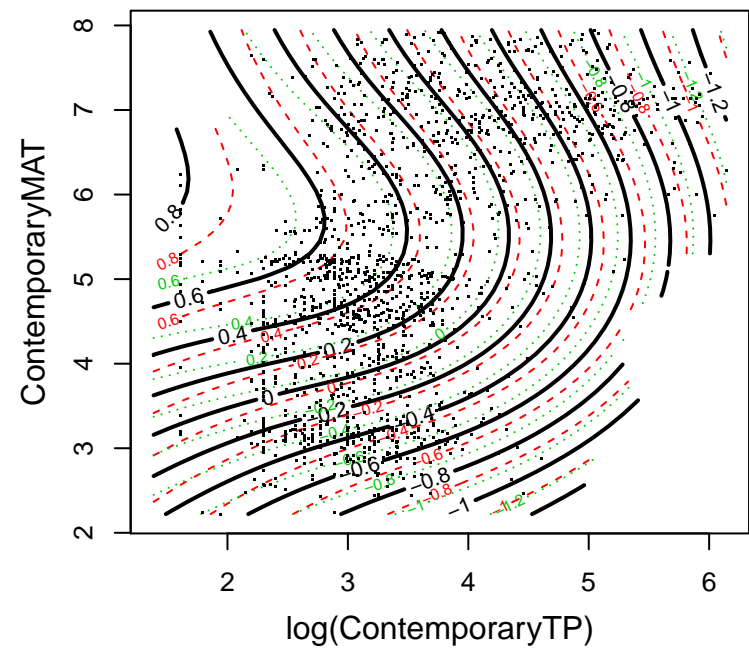

PMK

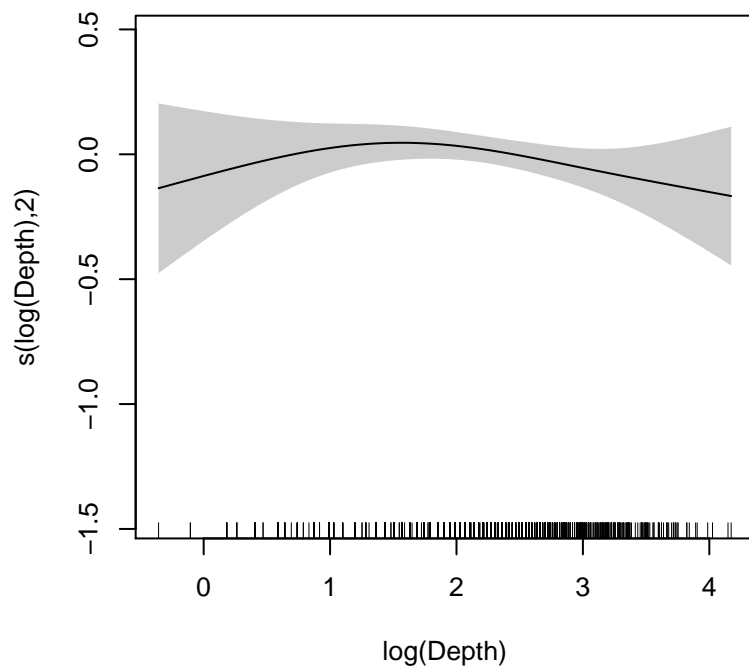

PMK

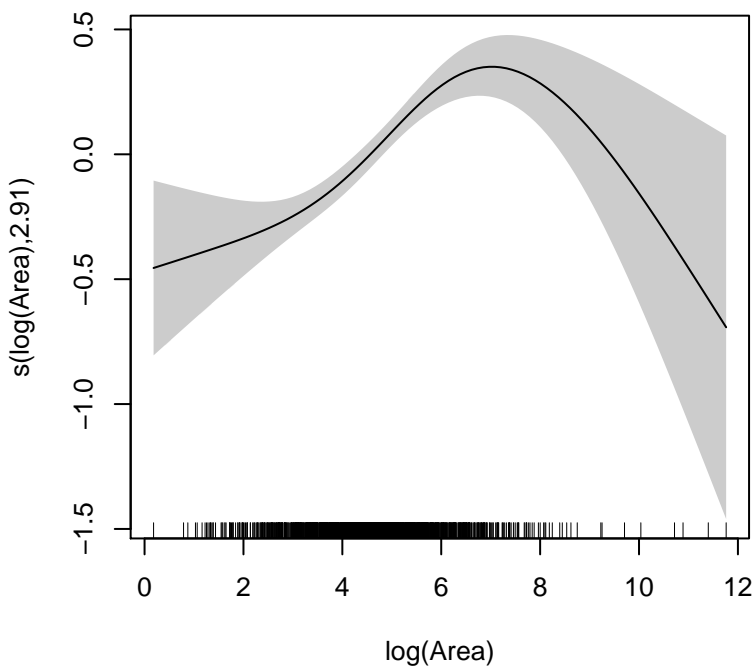

PMK

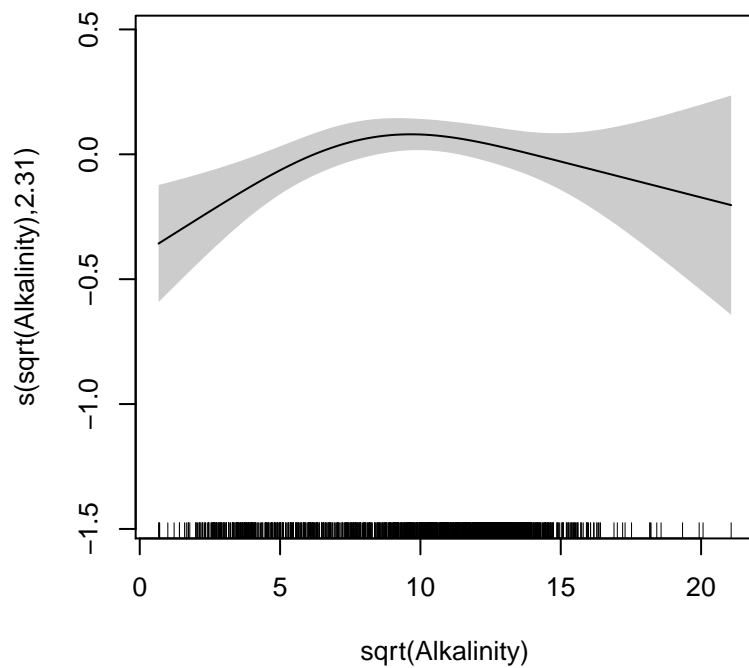

**BIB**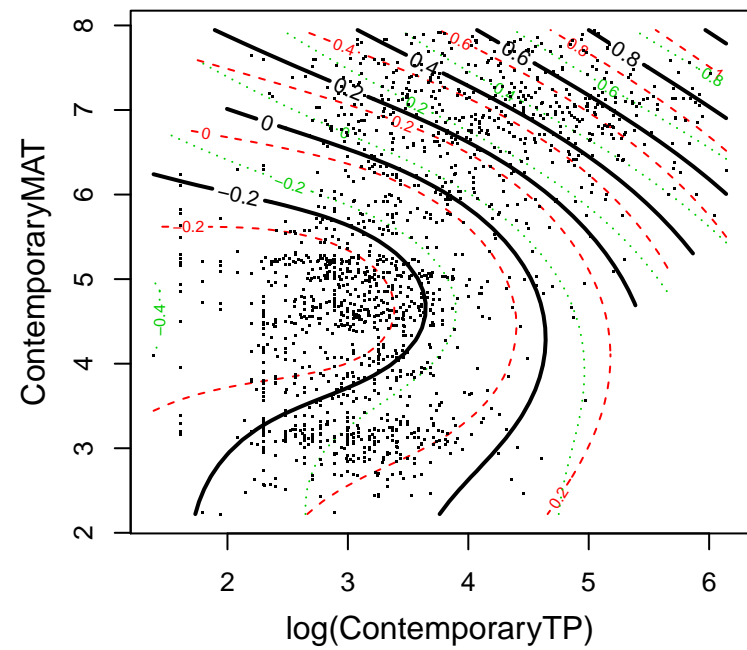**BIB**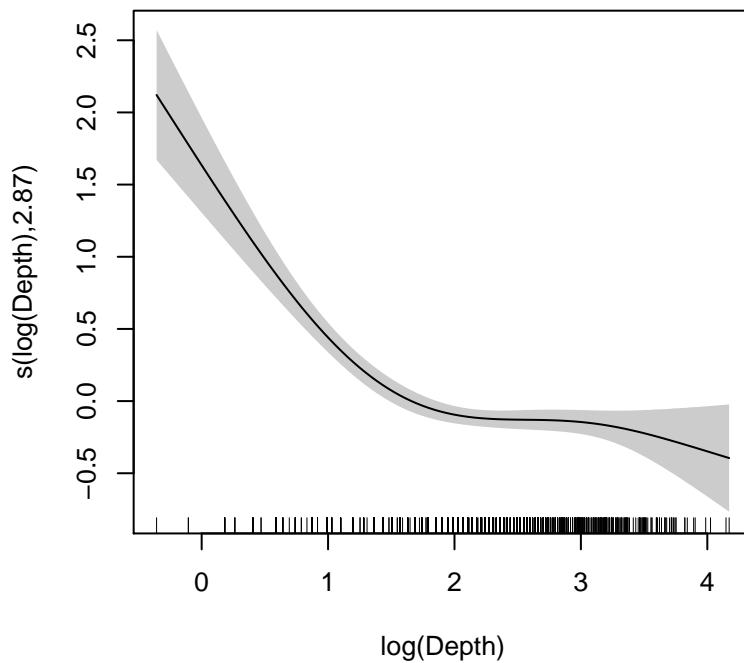**BIB**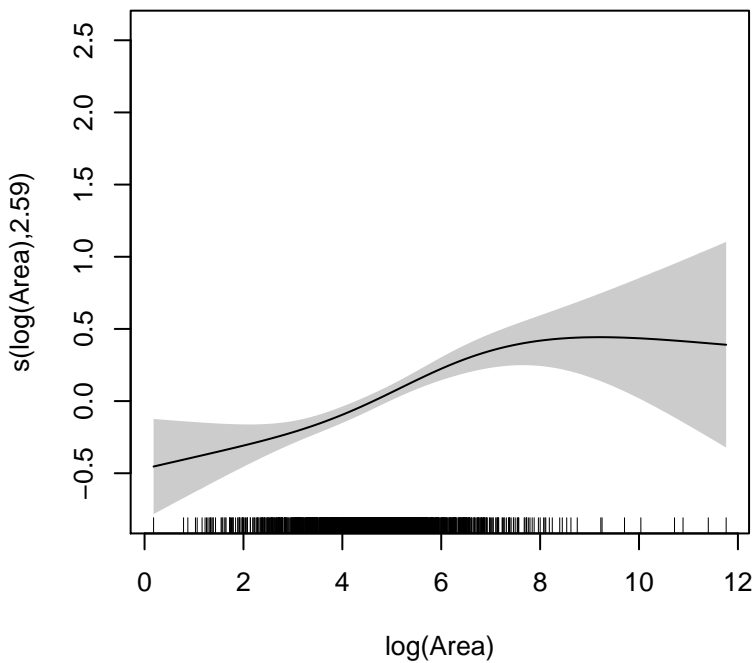**BIB**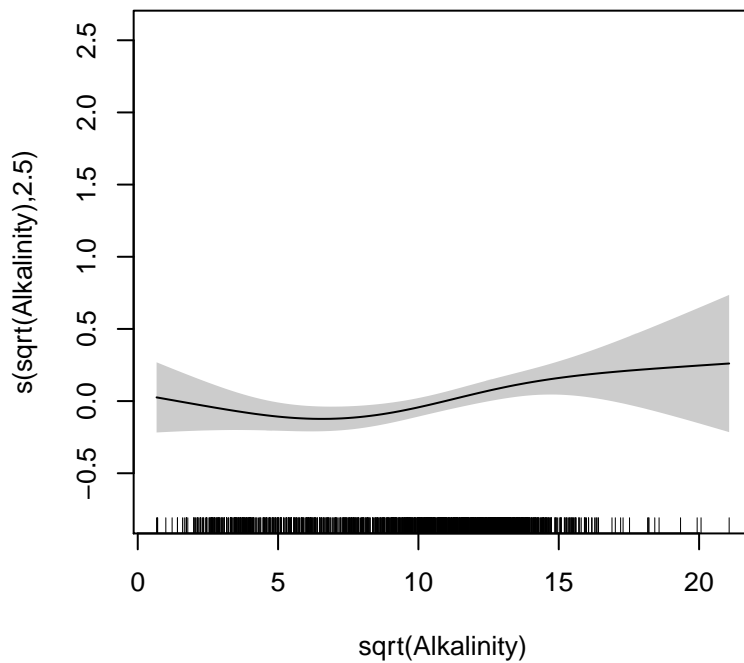



CCF

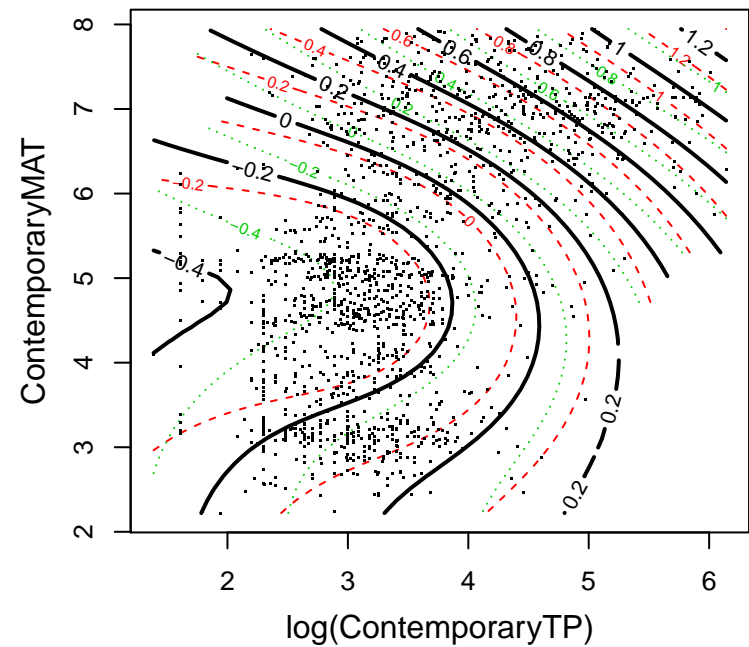

CCF

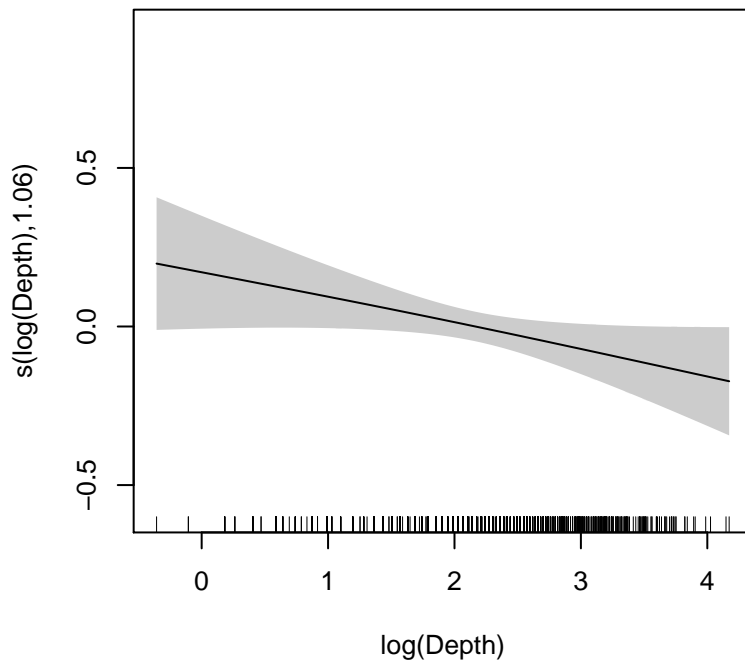

CCF

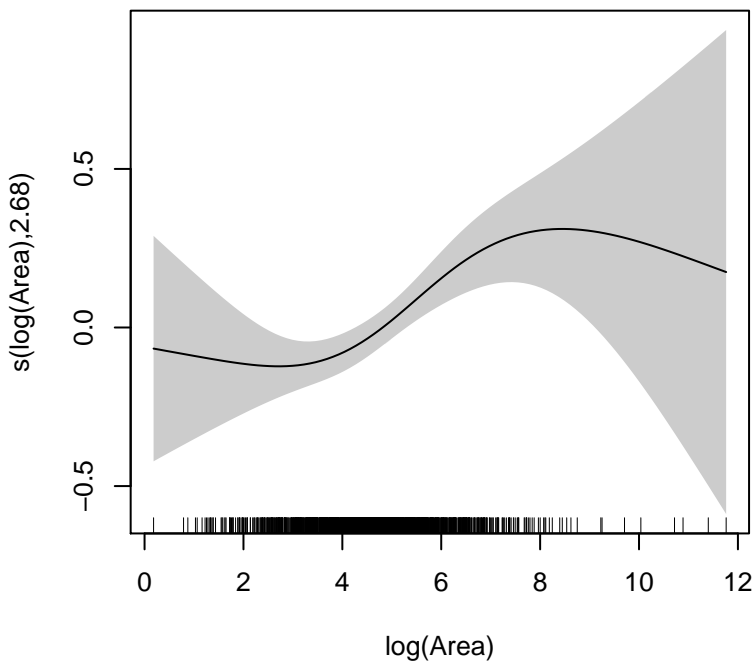

CCF

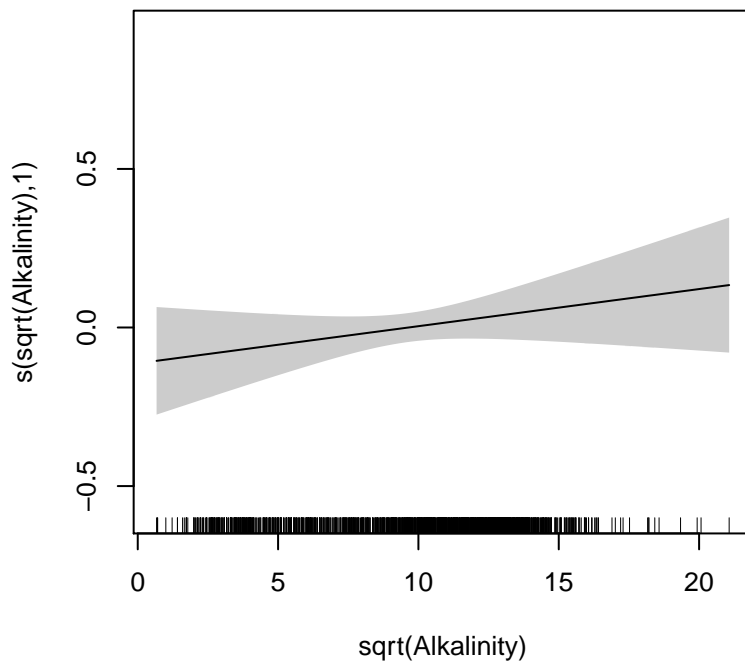

**WHC**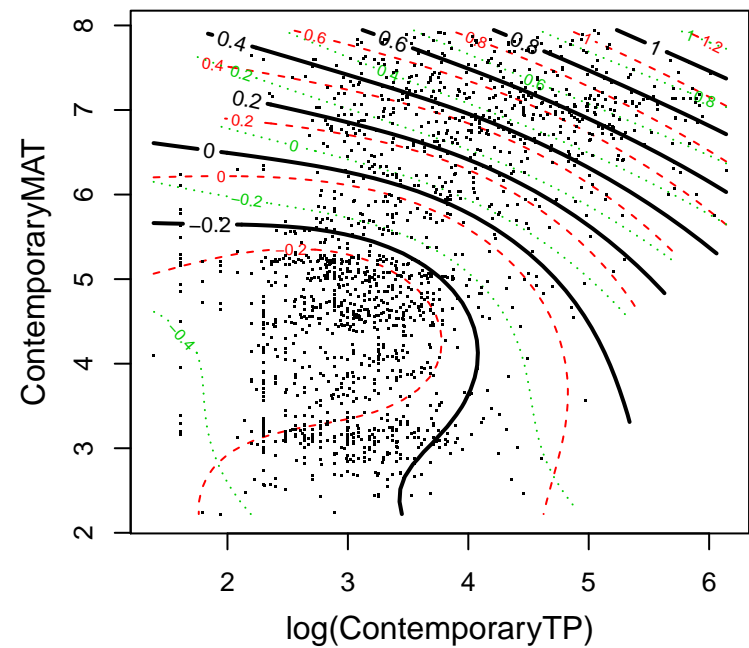**WHC**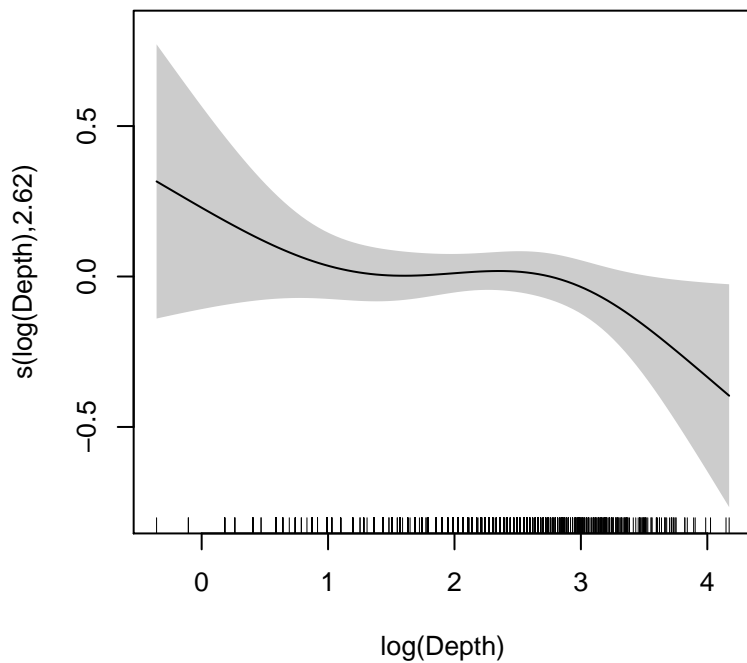**WHC**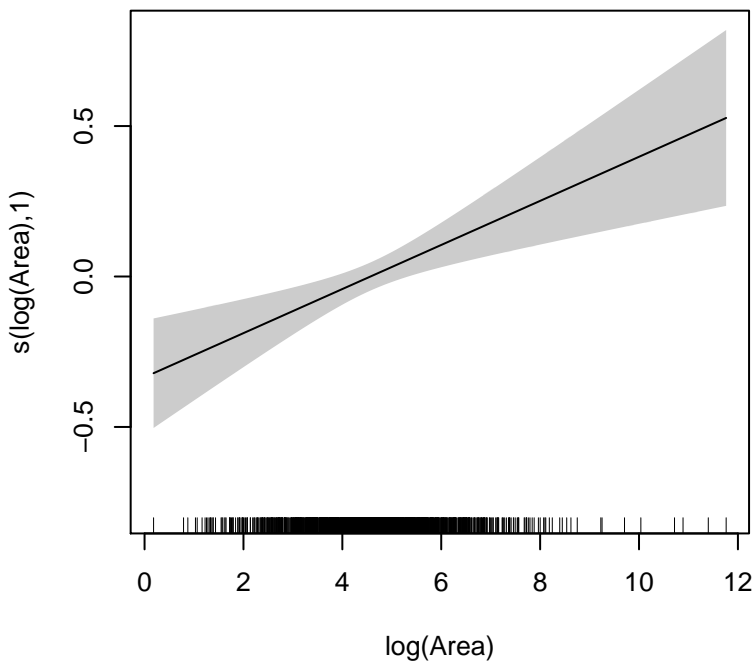**WHC**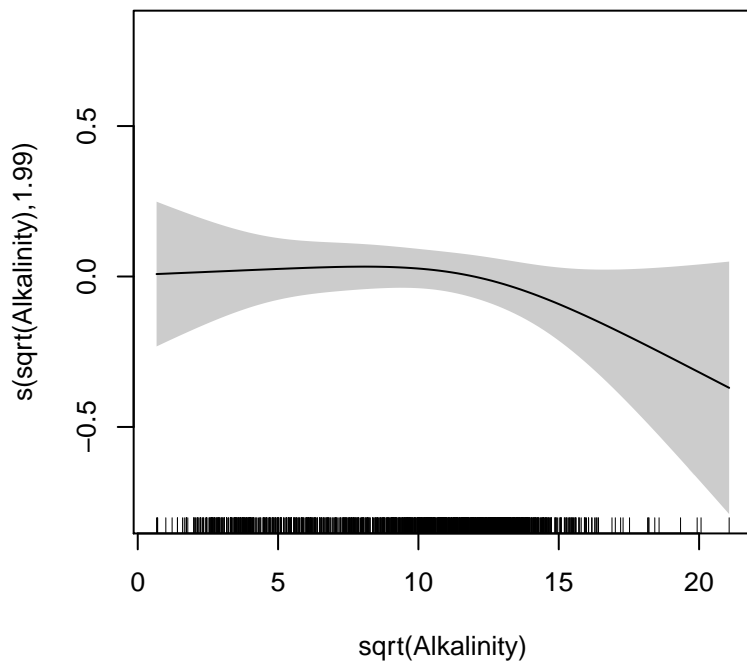

**LMB**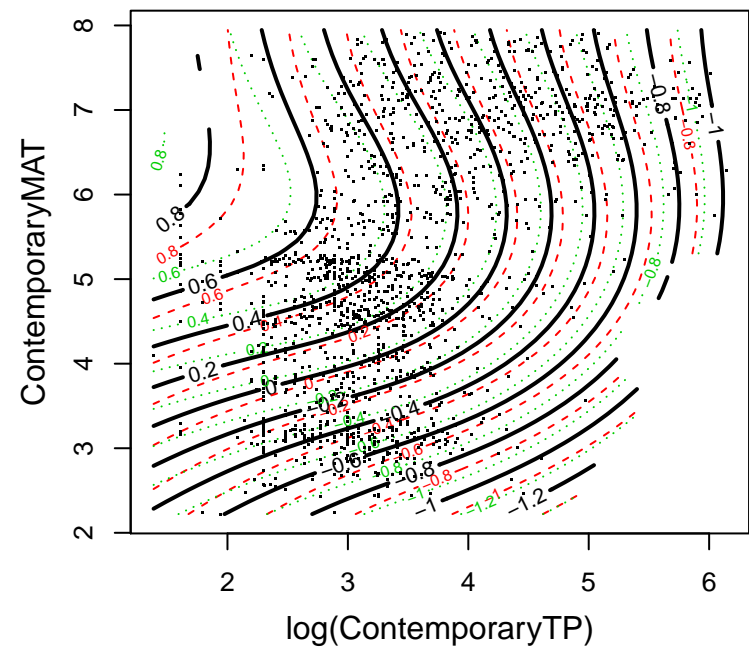**LMB**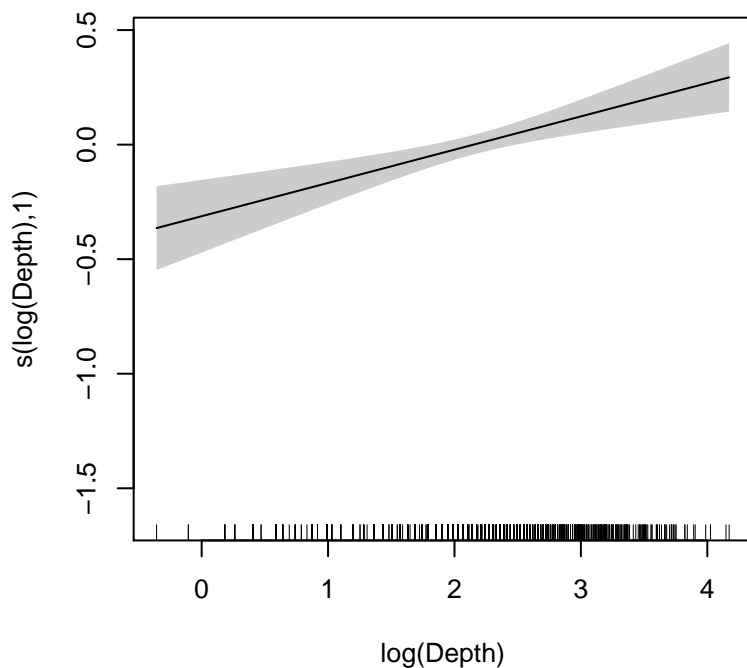**LMB**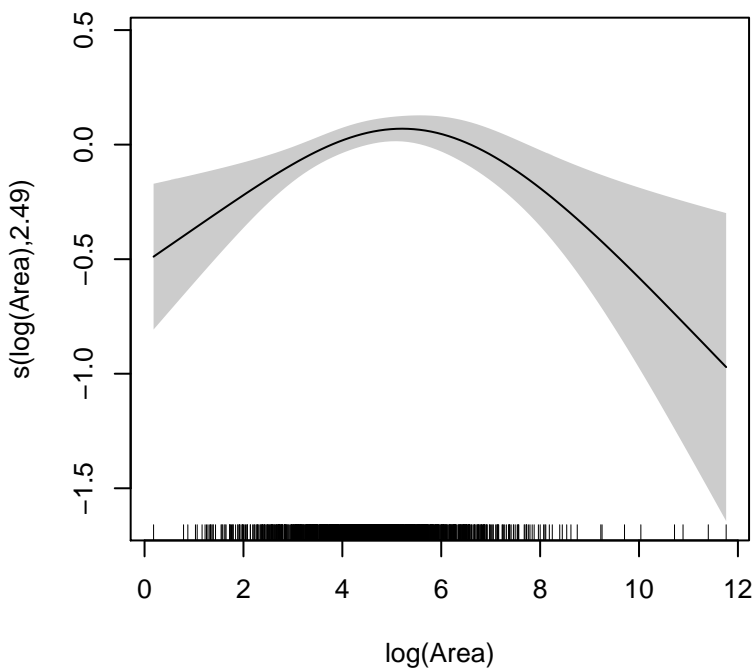**LMB**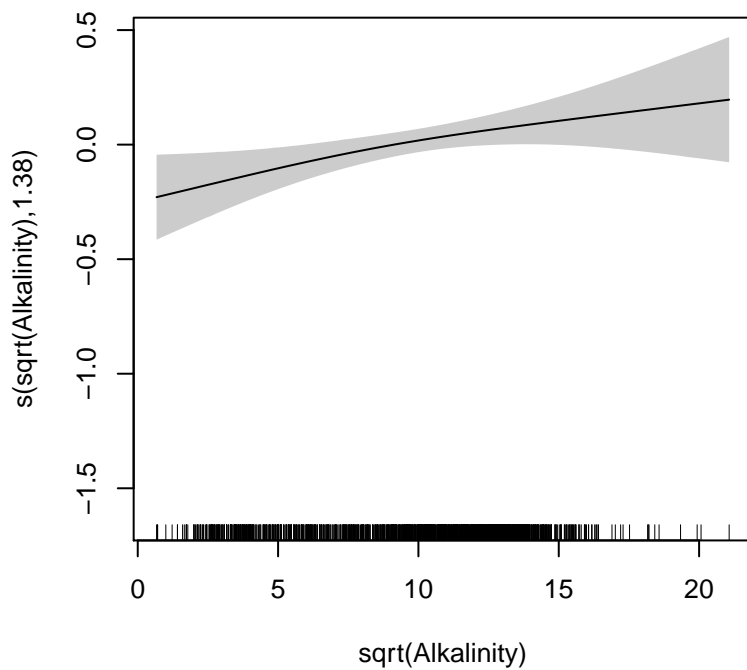

BRB

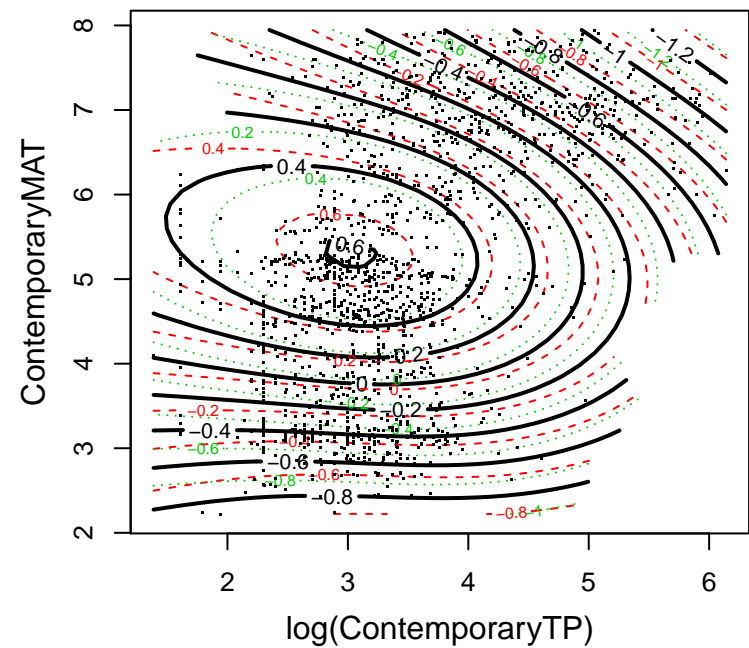

BRB

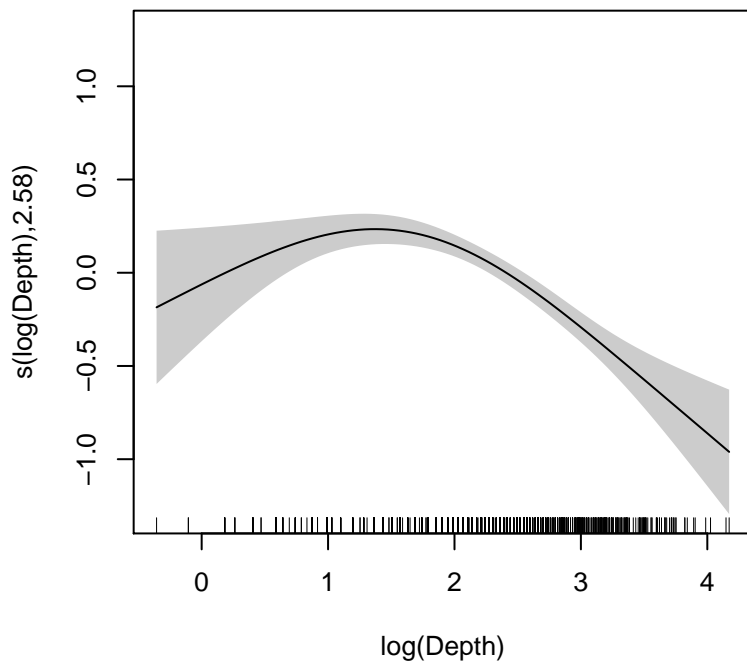

BRB

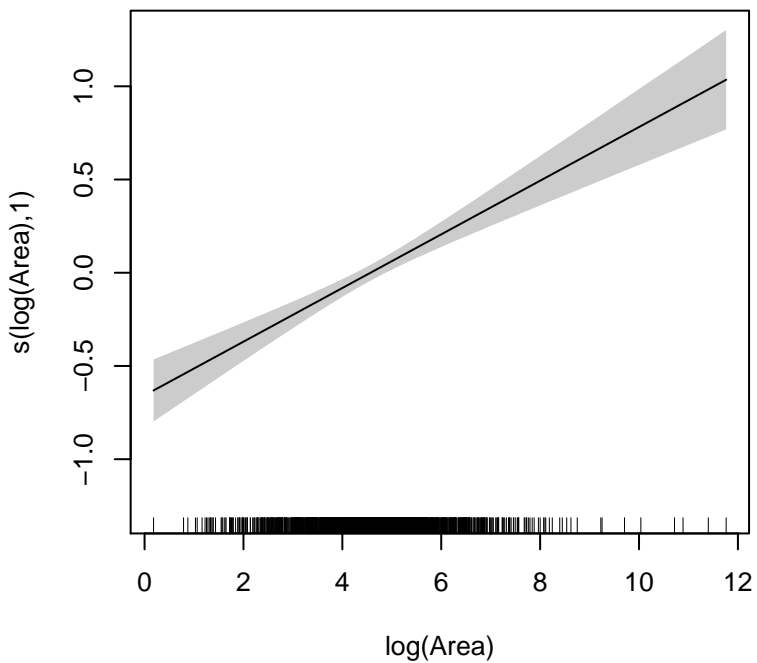

BRB

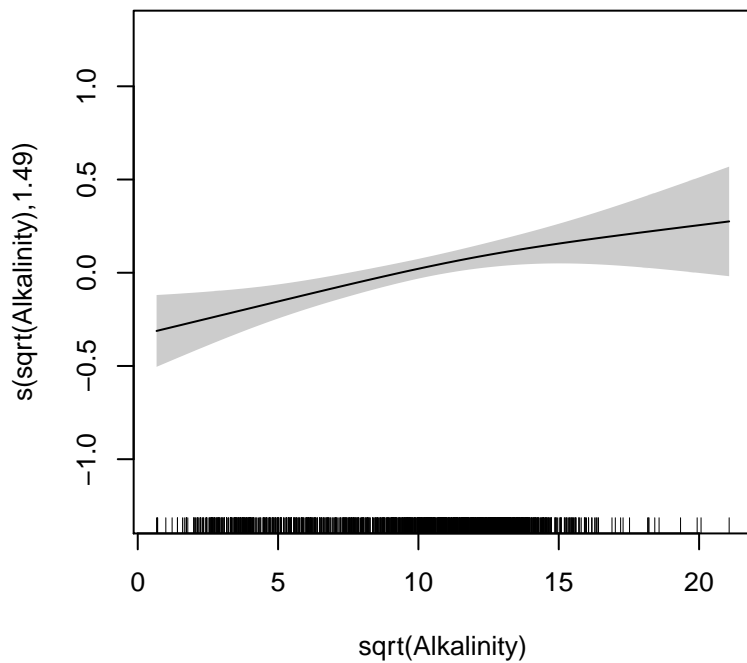

**BLC**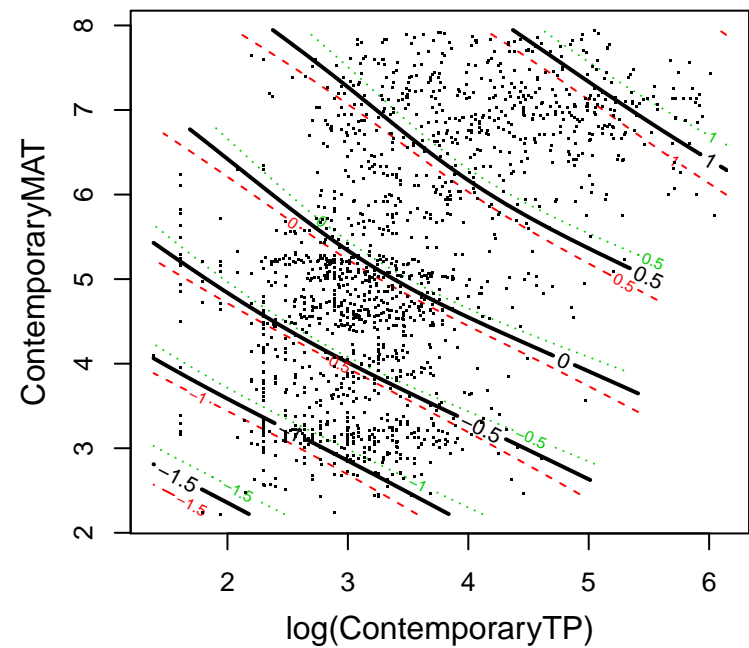**BLC**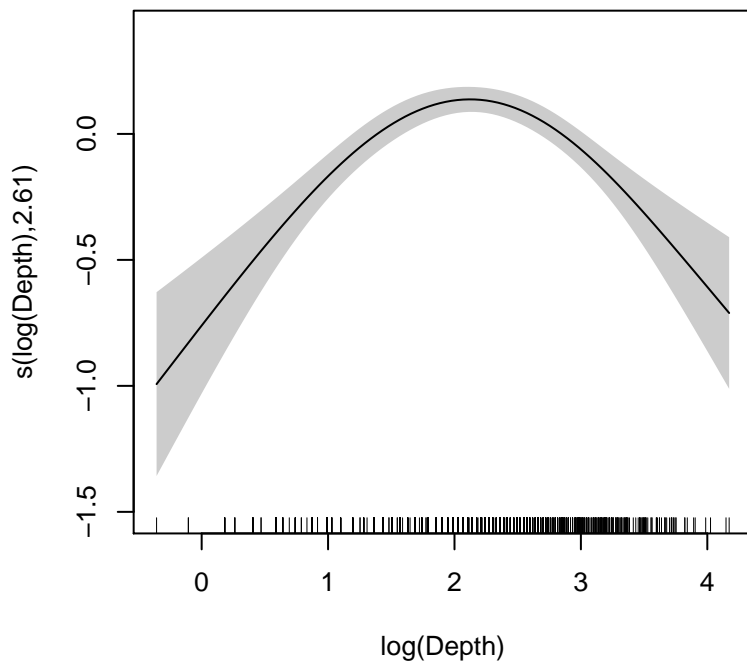**BLC**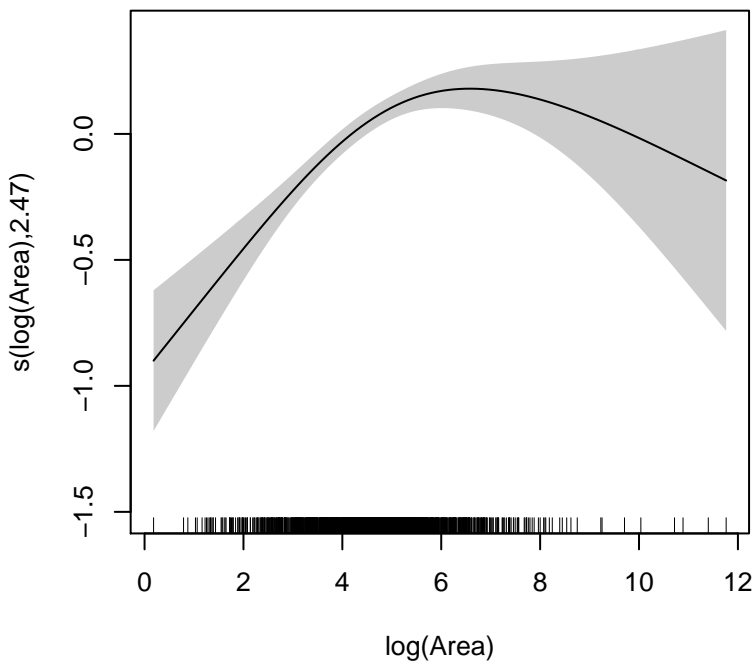**BLC**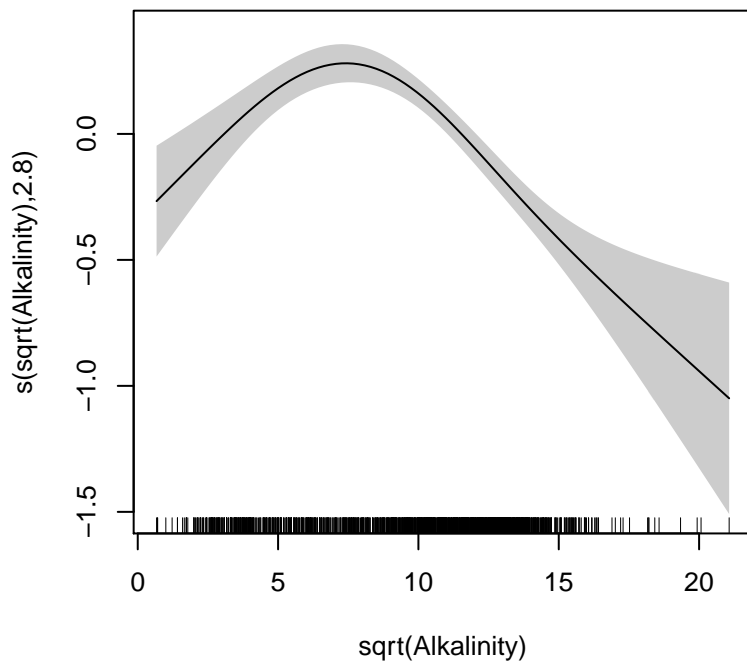

**BLB**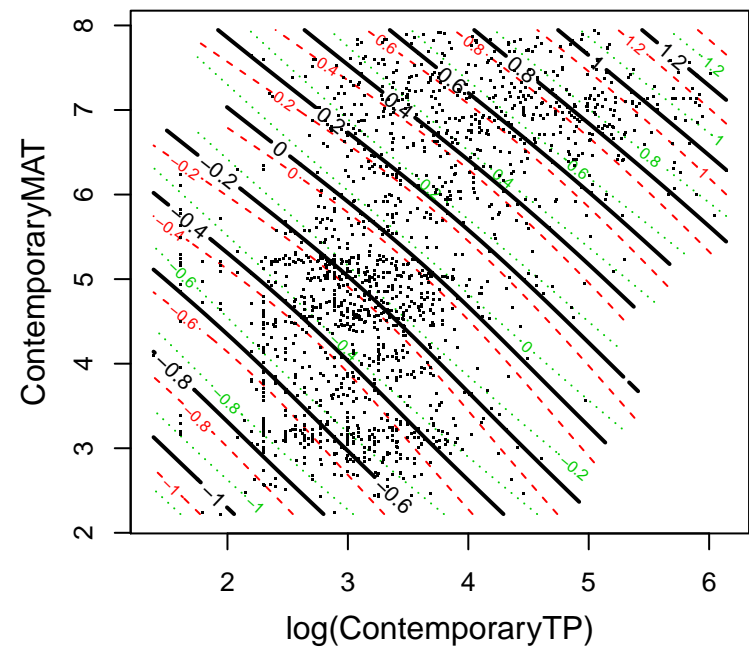**BLB**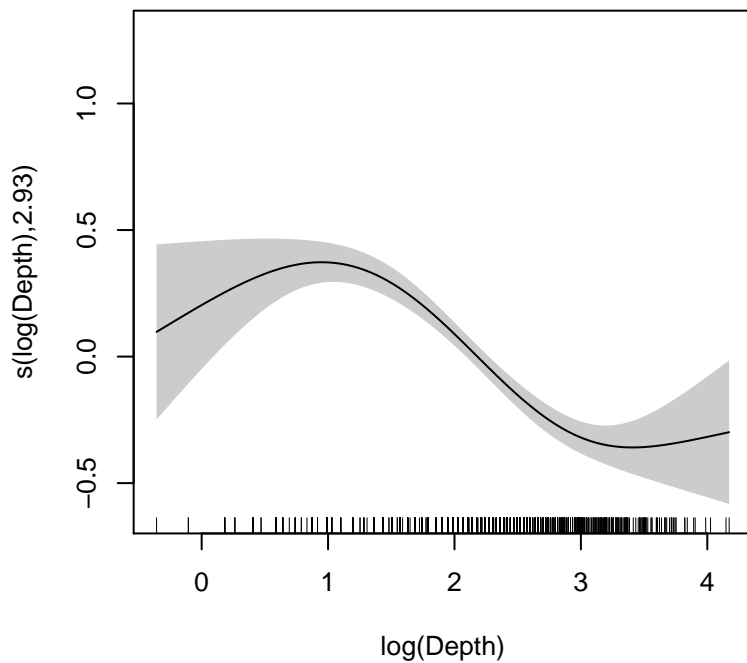**BLB**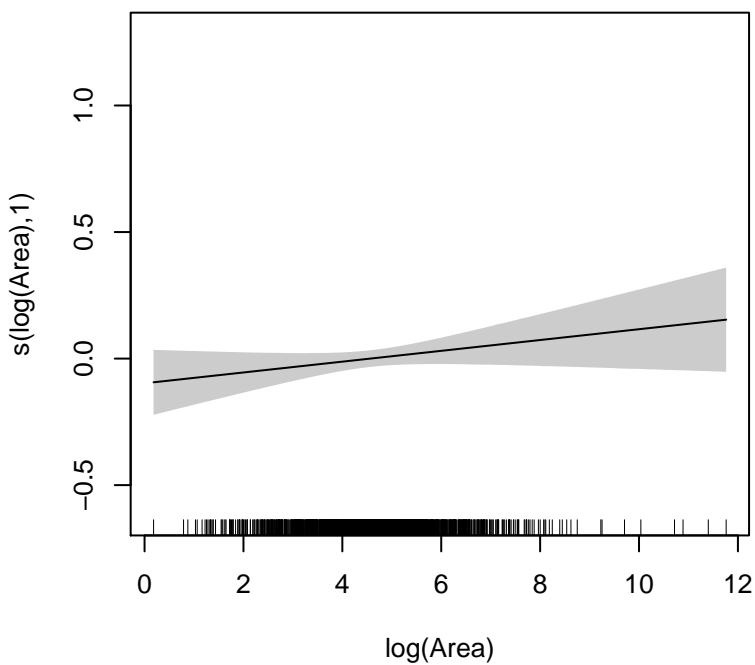**BLB**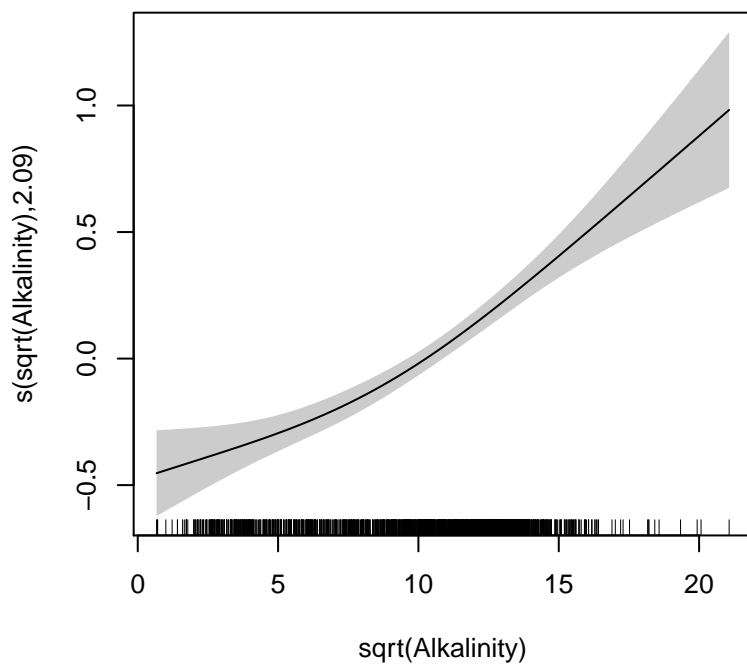

**GOS**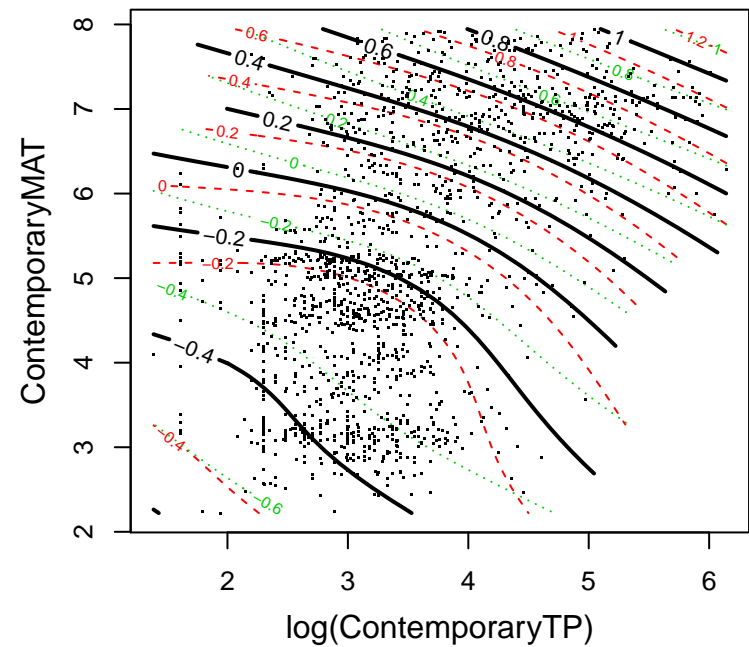**GOS**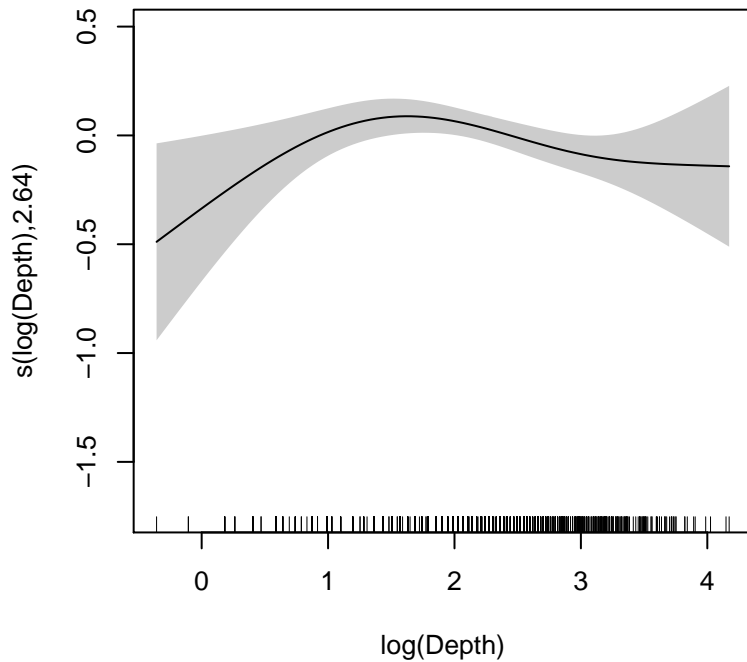**GOS**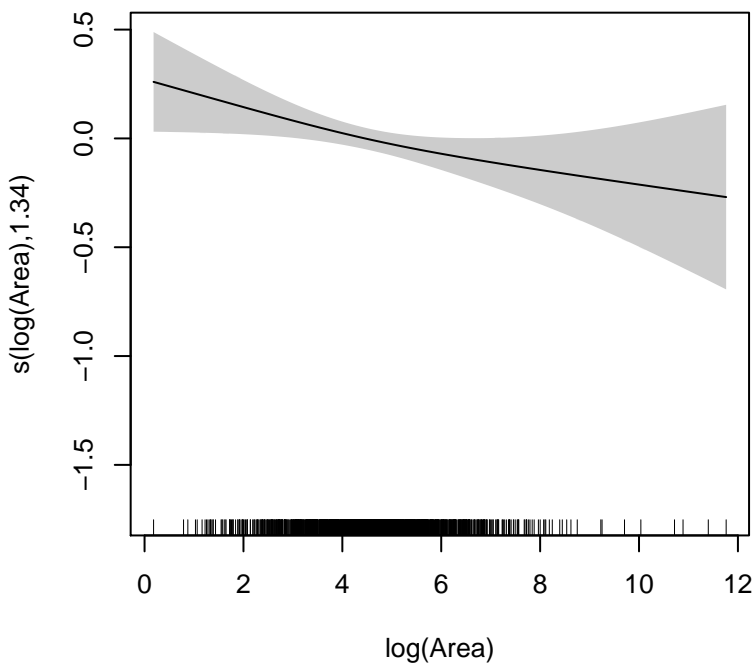**GOS**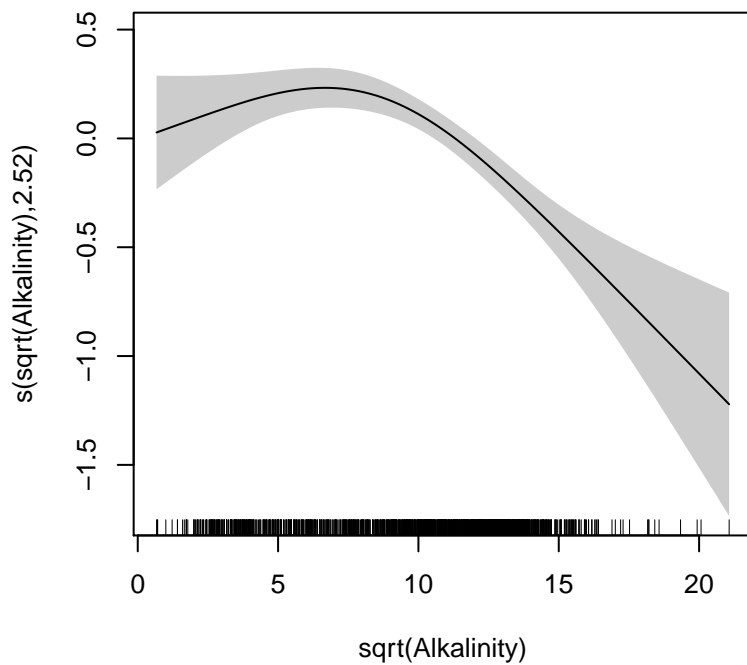

**MUE**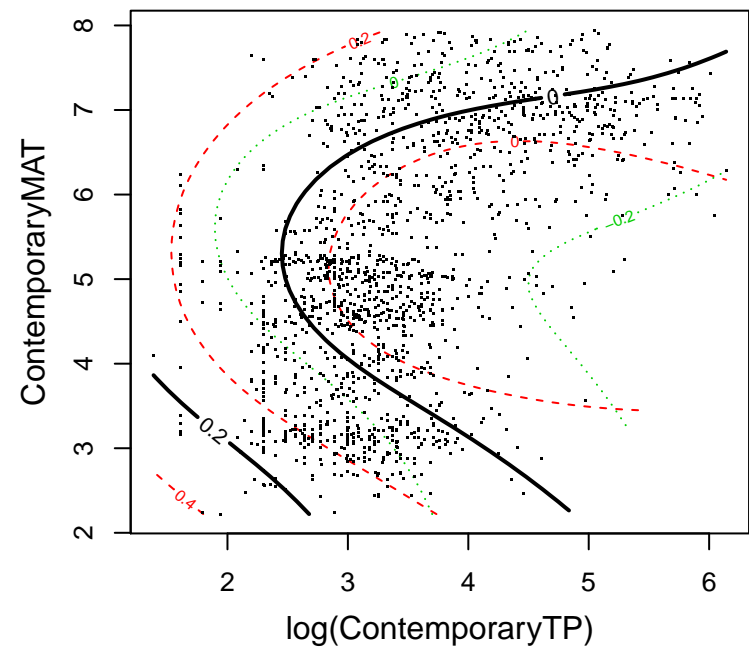**MUE**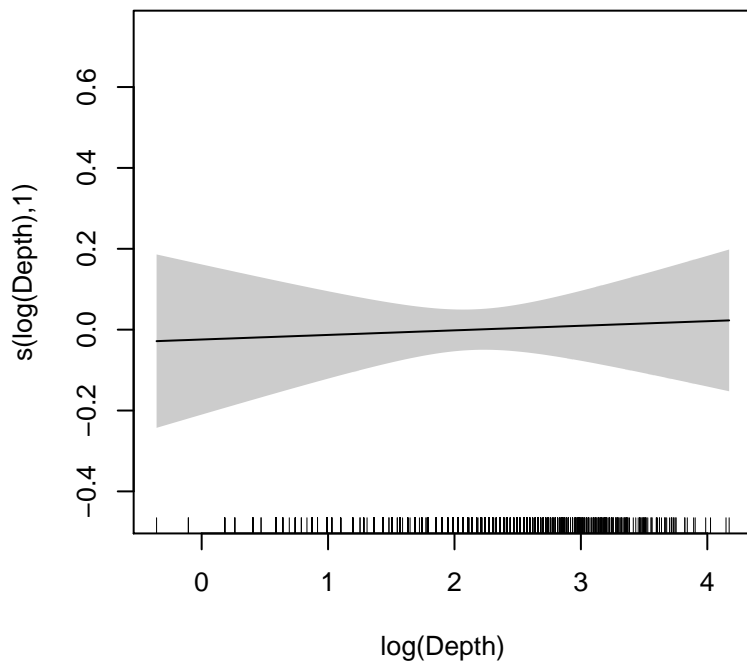**MUE**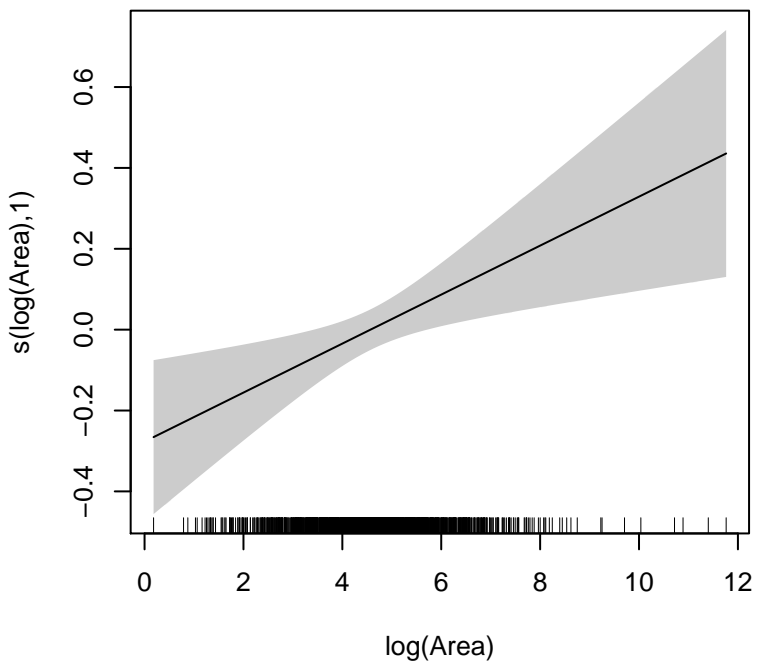**MUE**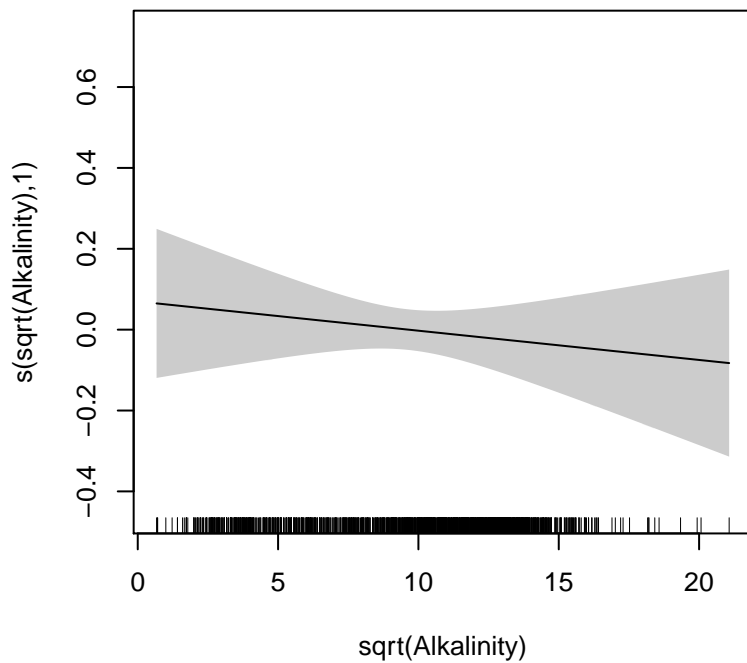



**NOP**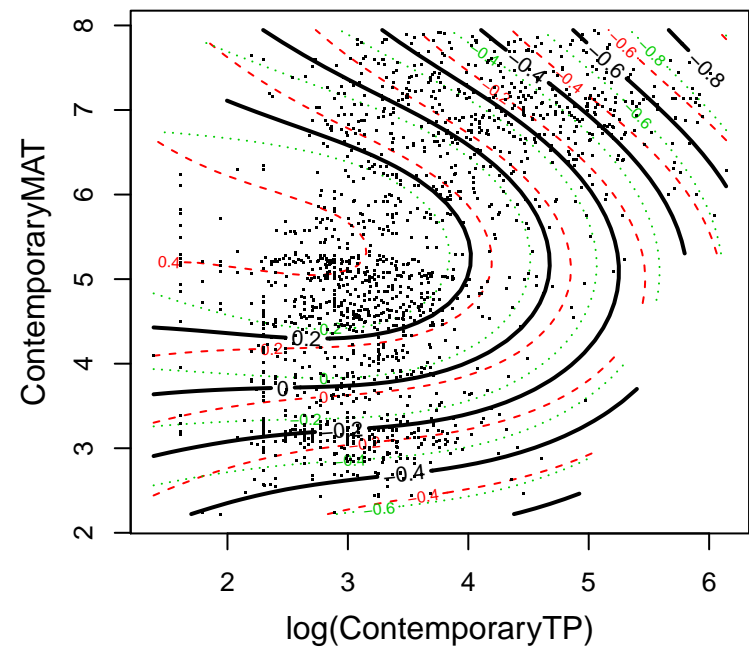**NOP**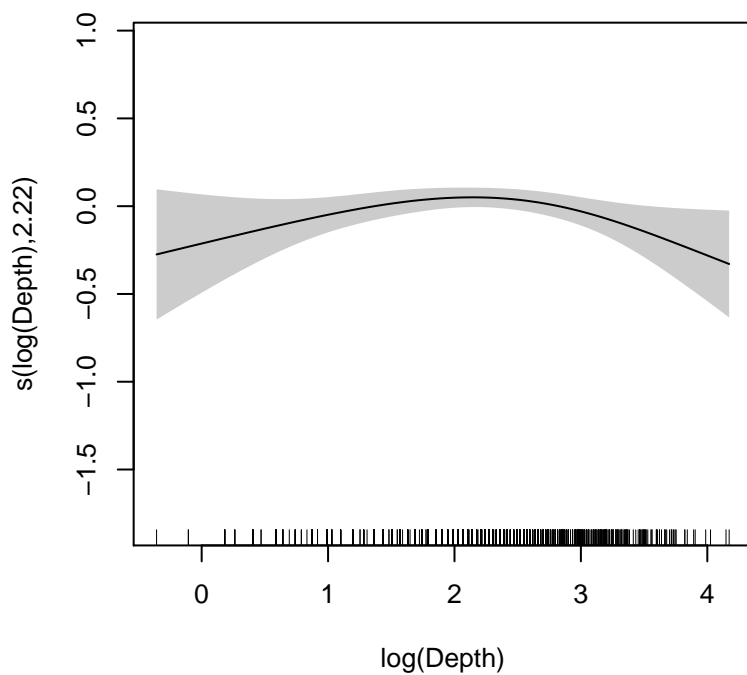**NOP**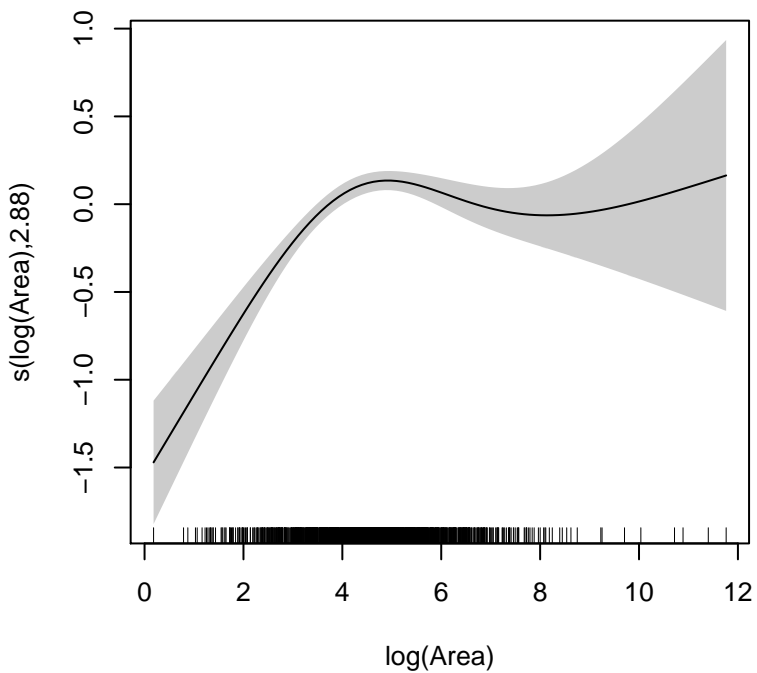**NOP**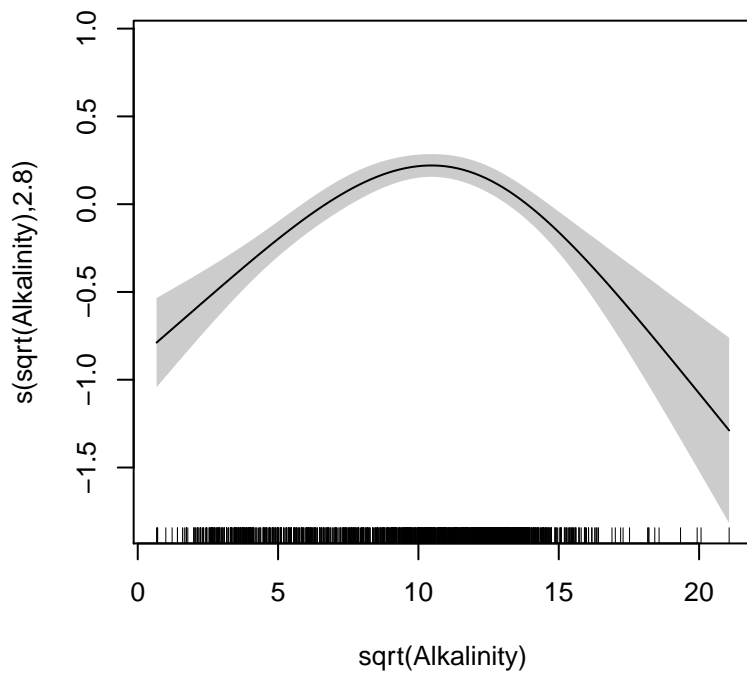

**BOF**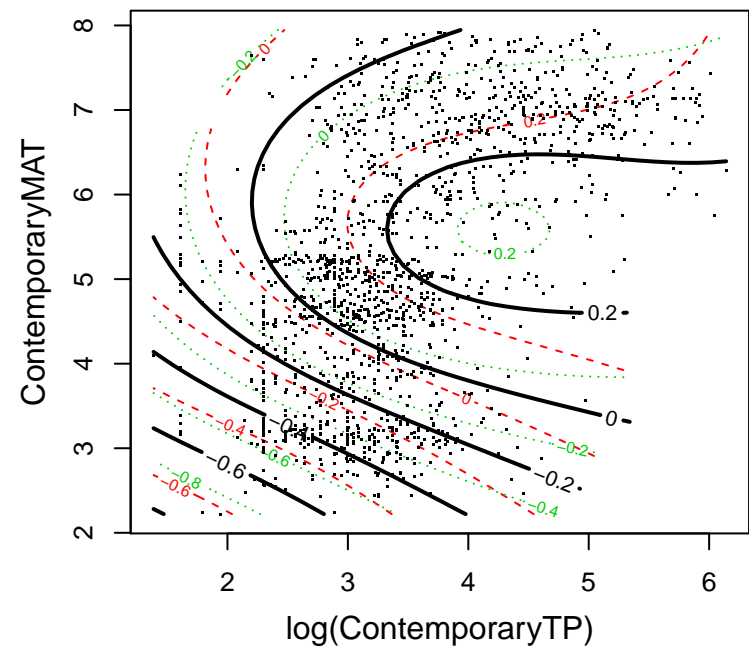**BOF**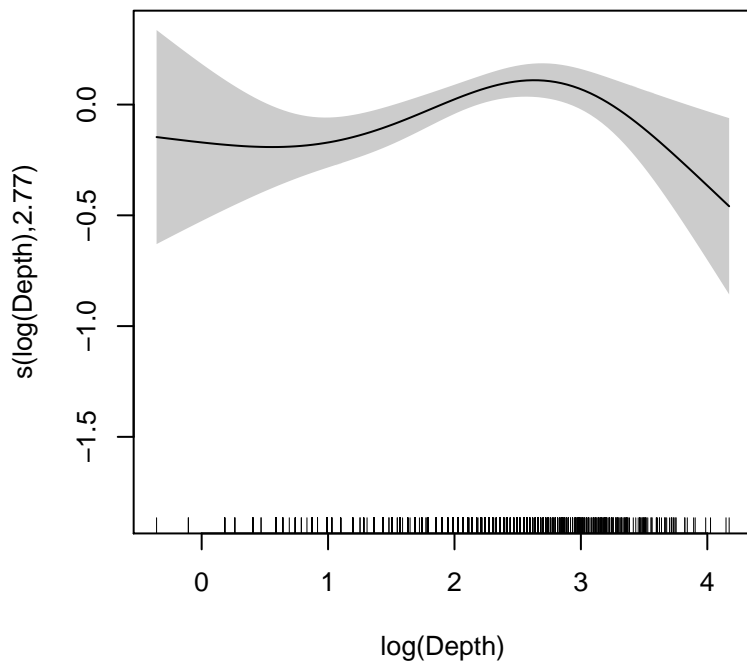**BOF**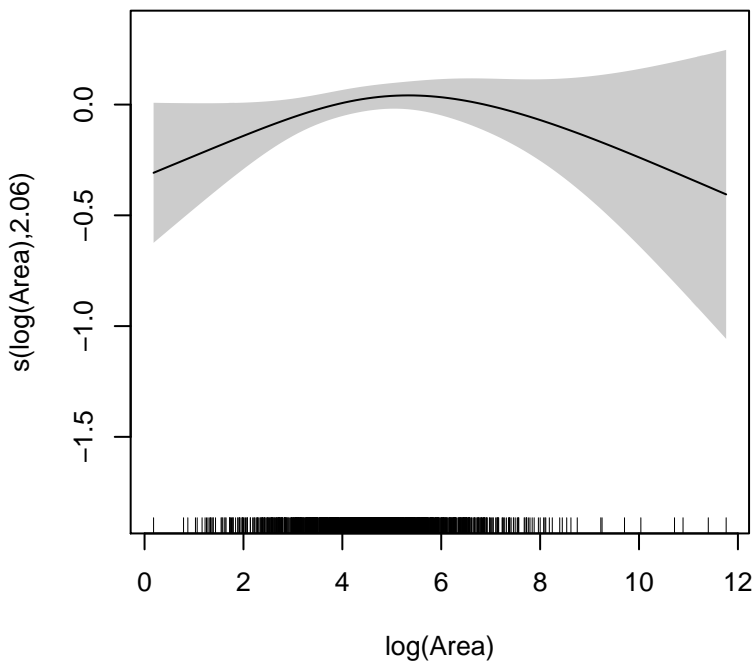**BOF**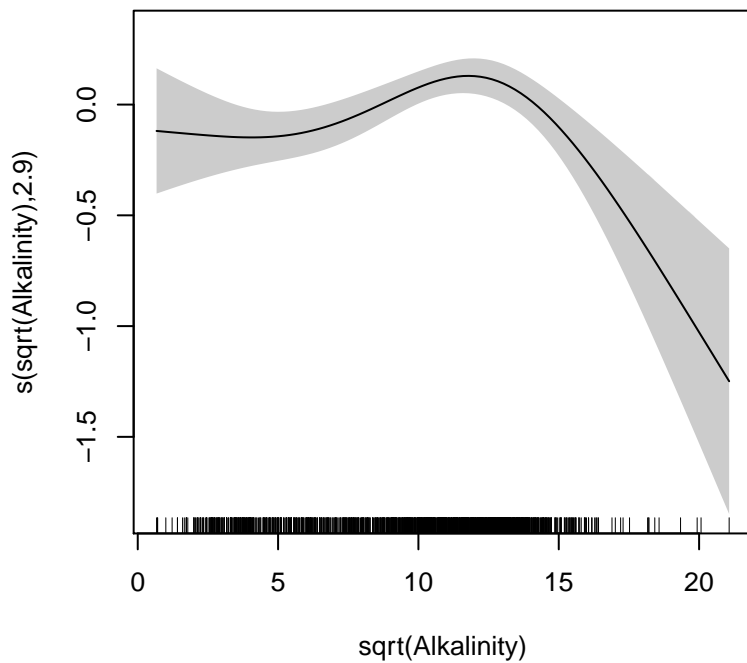

**SHR**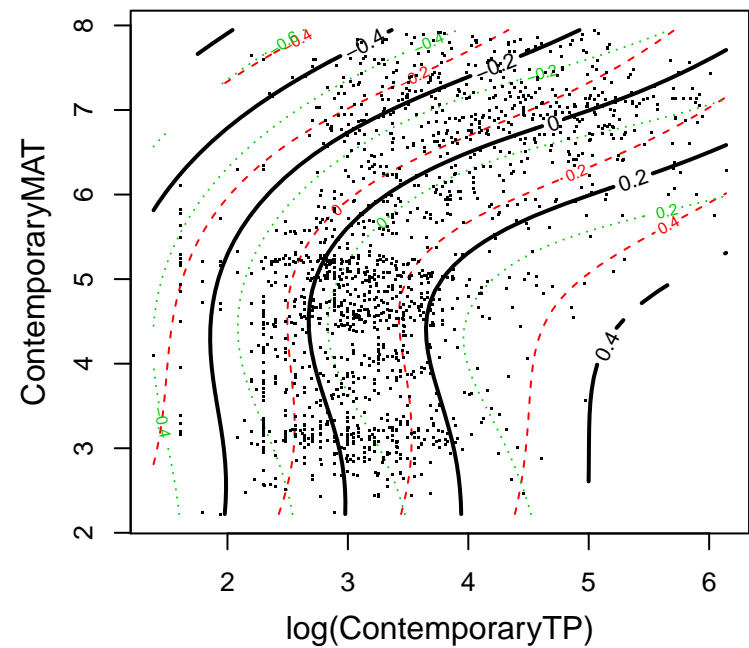**SHR**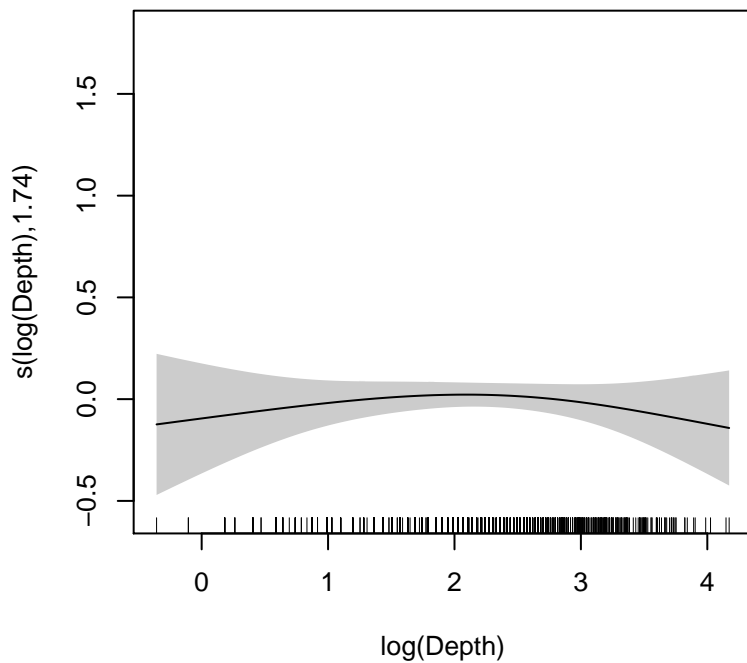**SHR**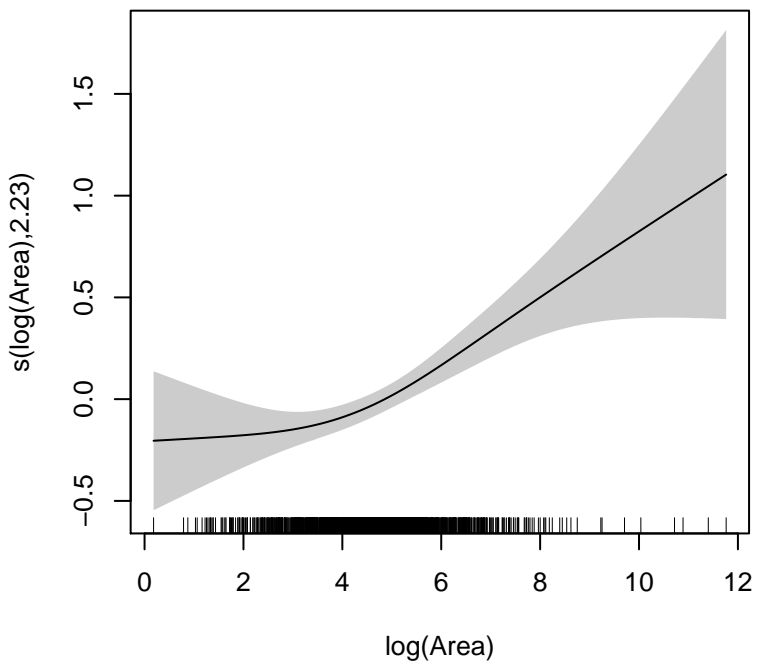**SHR**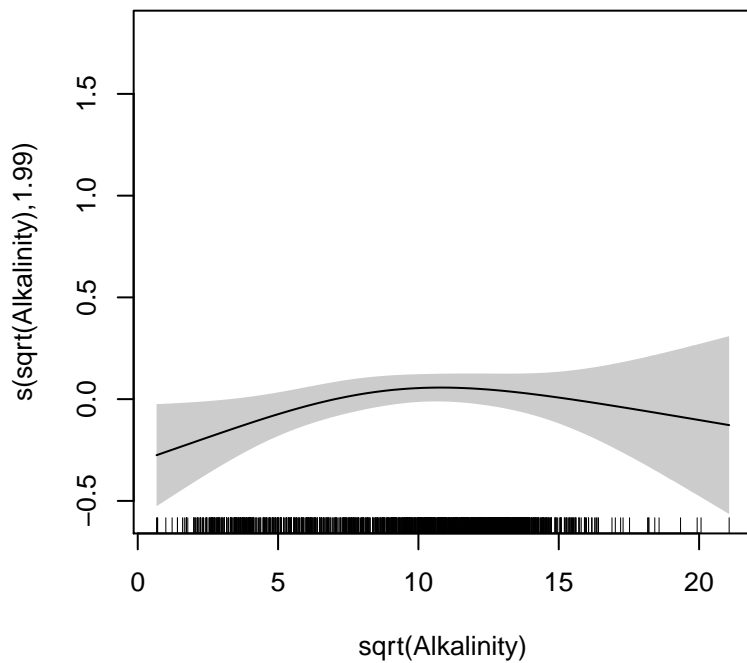

SLR

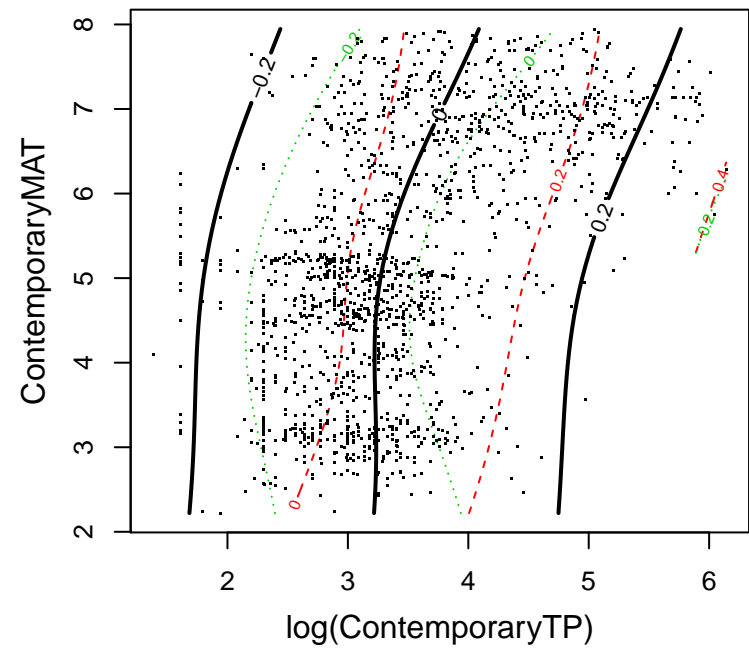

SLR

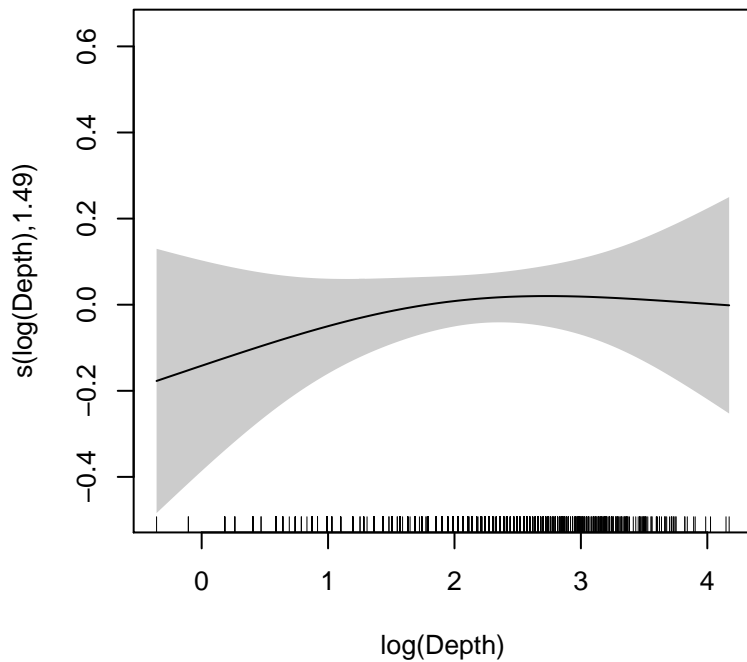

SLR

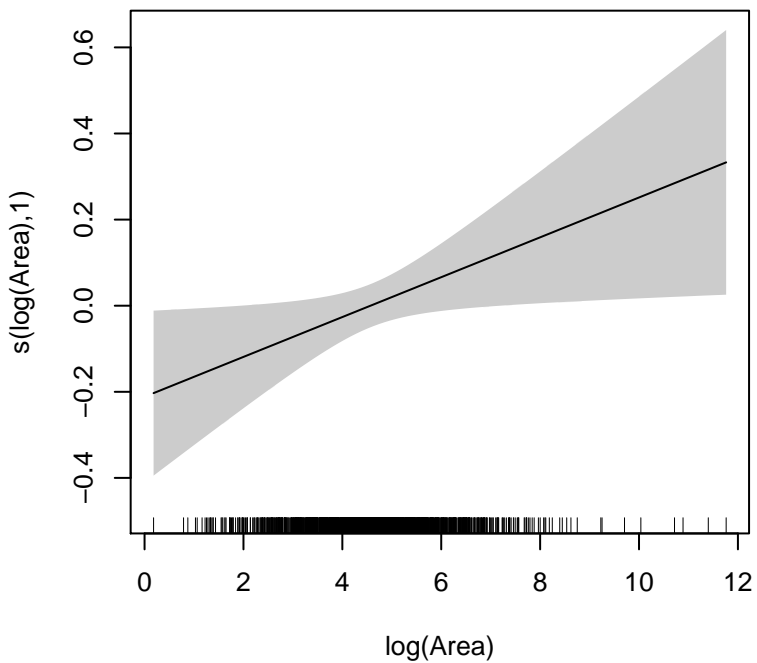

SLR

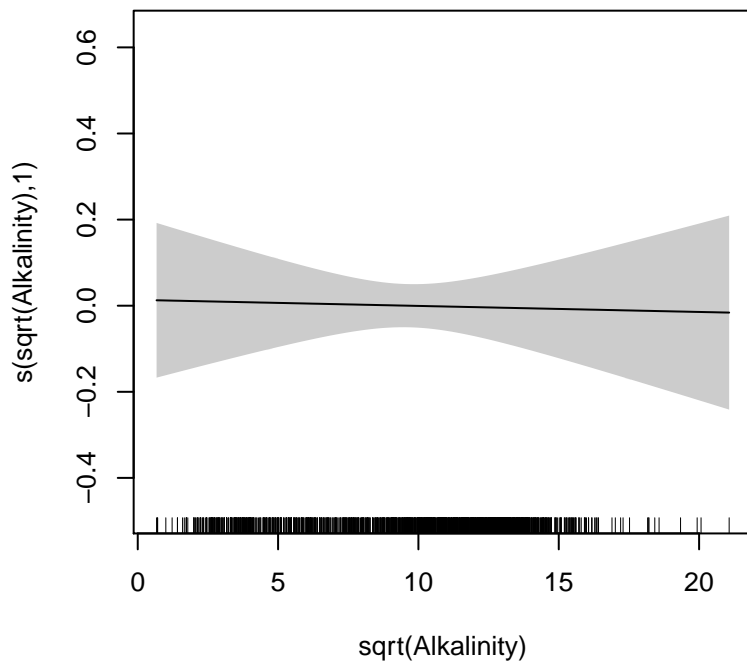

**SMB**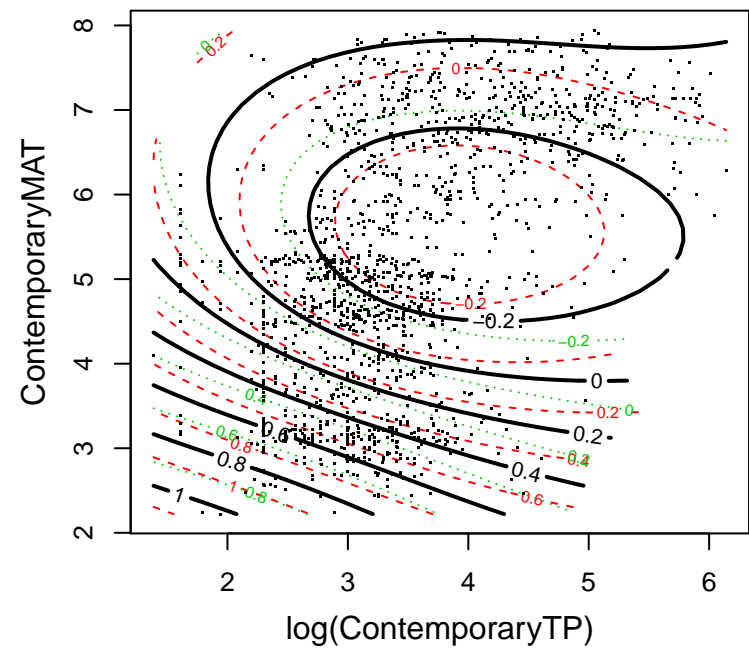**SMB**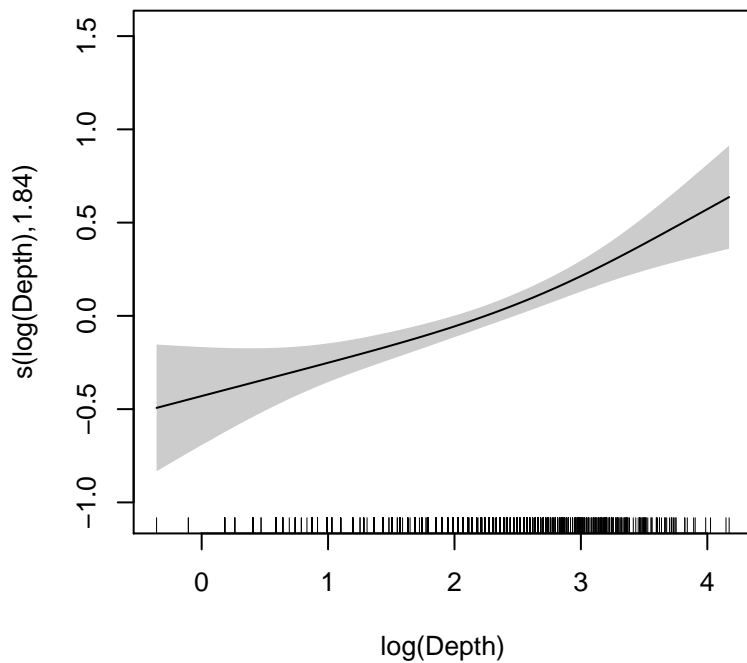**SMB**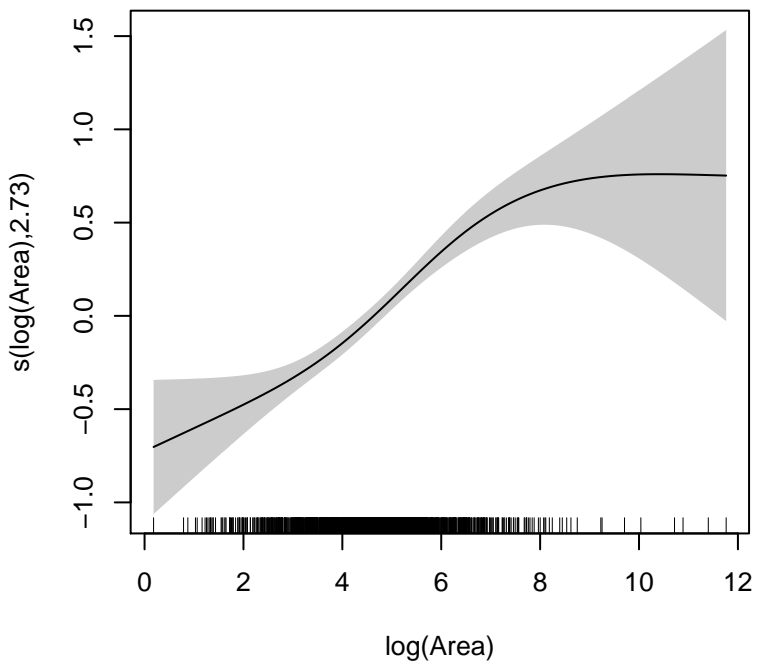**SMB**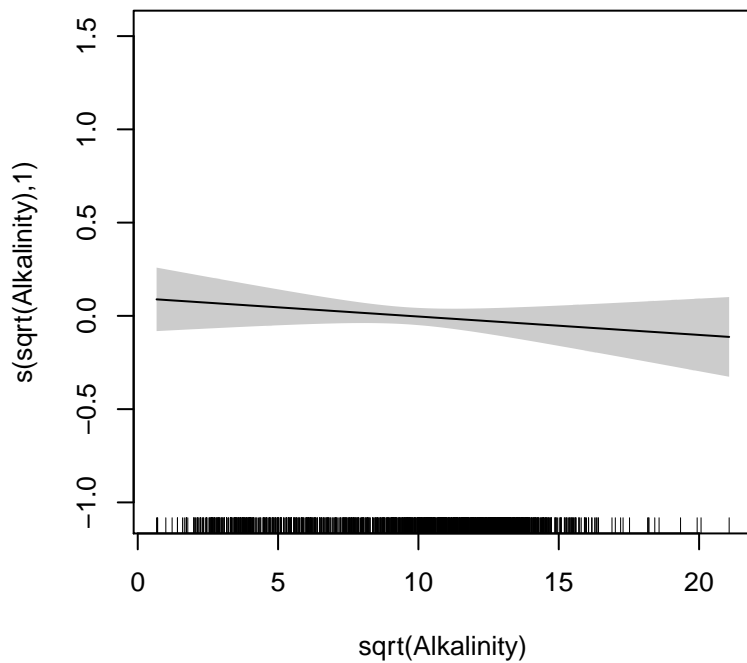

**RKB**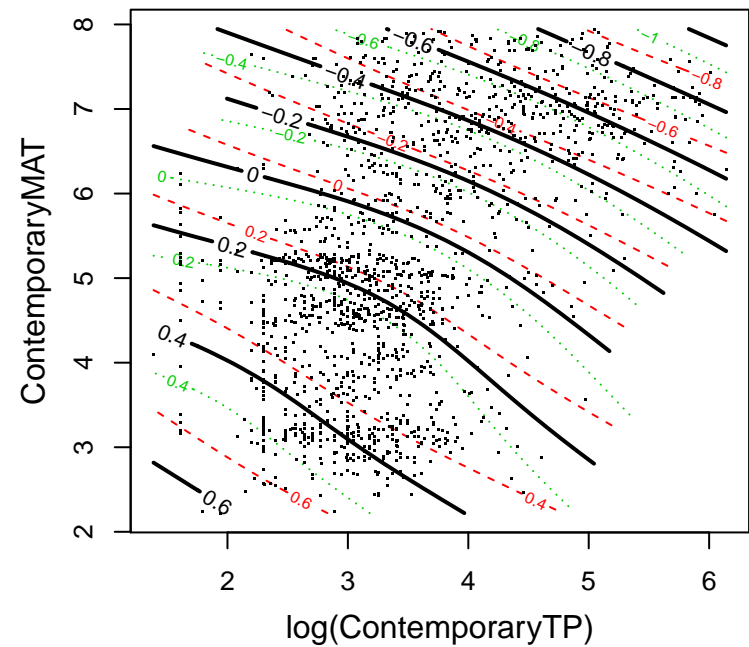**RKB**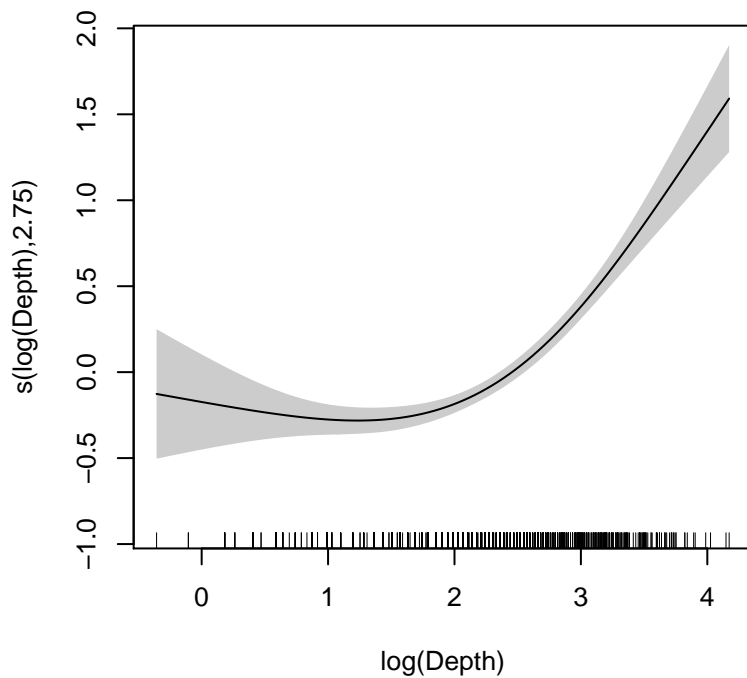**RKB**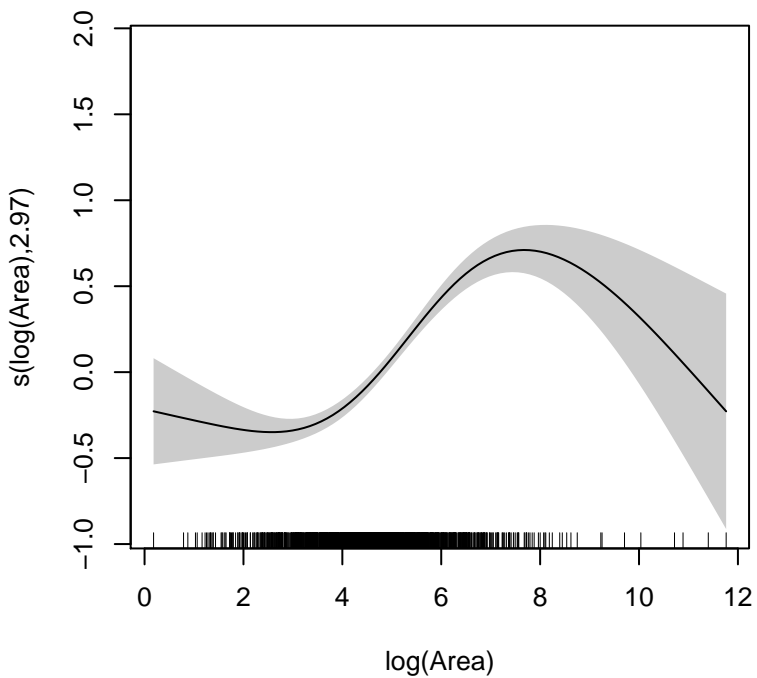**RKB**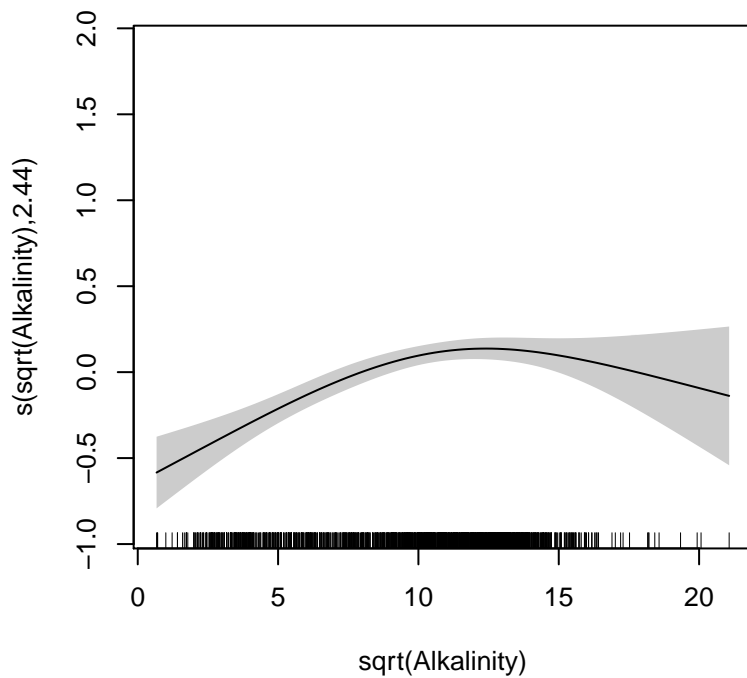

WAE

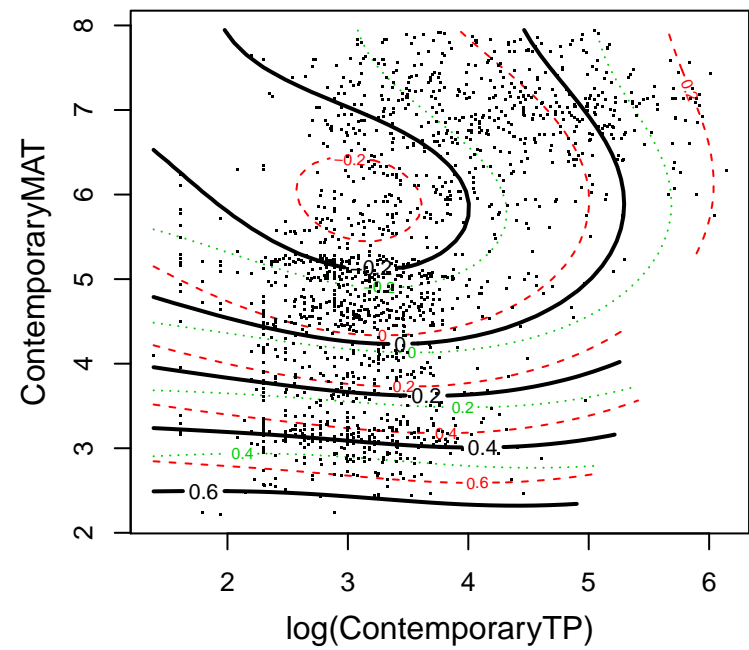

WAE

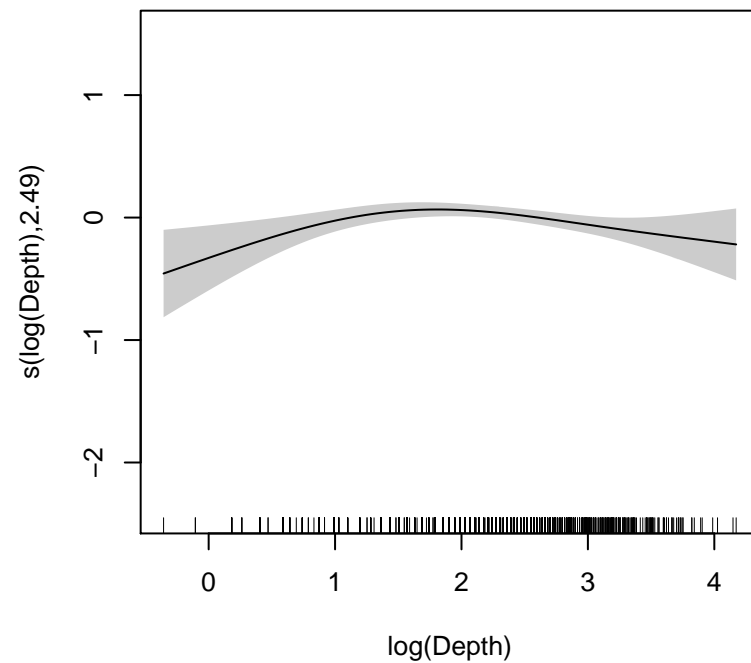

WAE

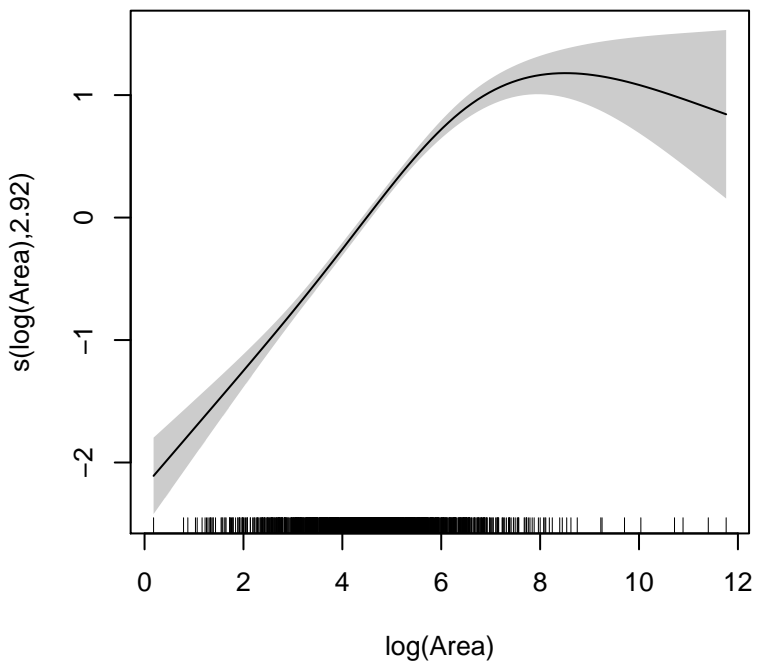

WAE

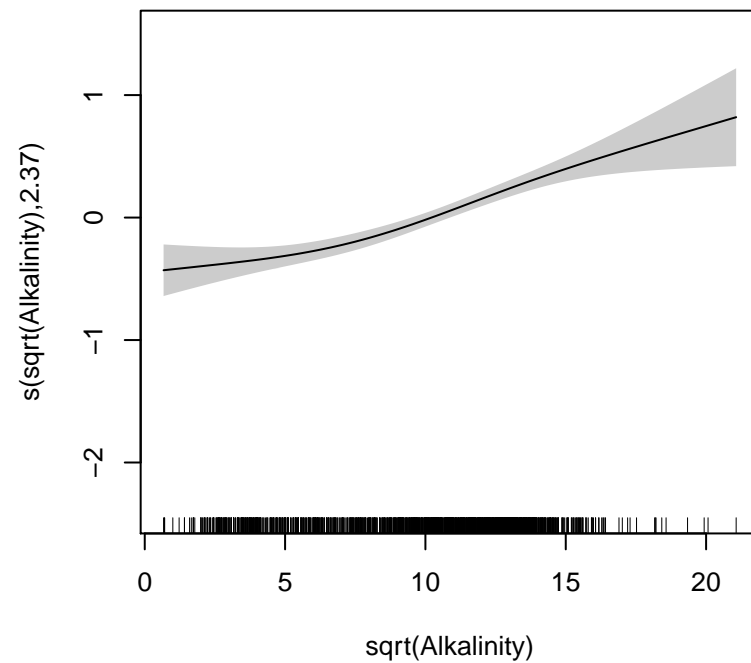

**WTS**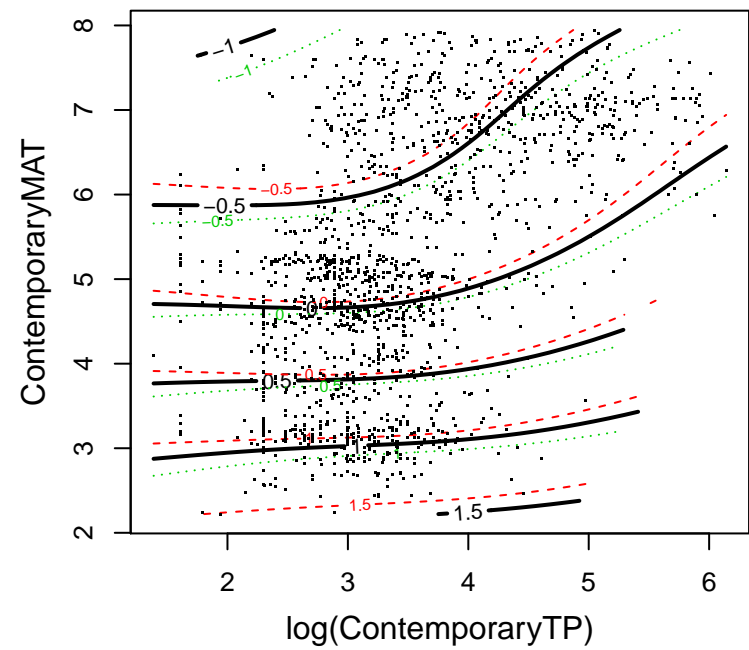**WTS**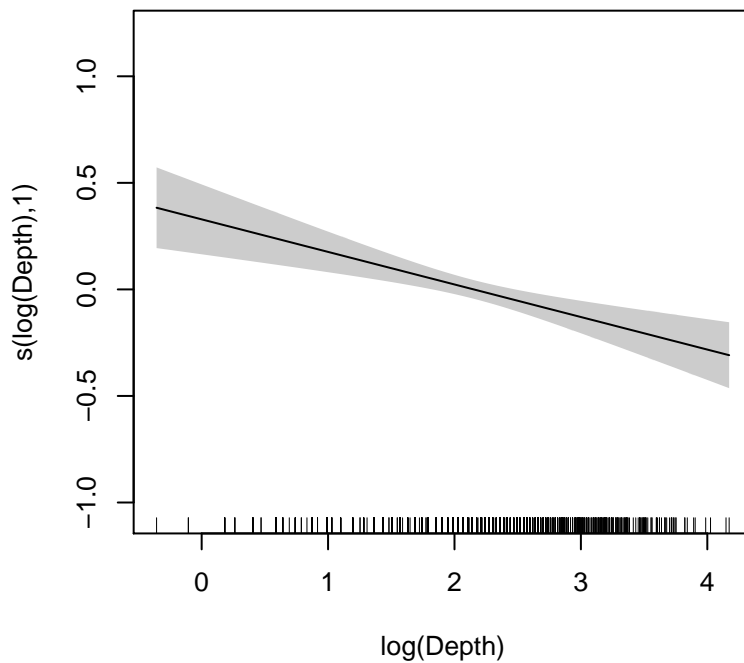**WTS**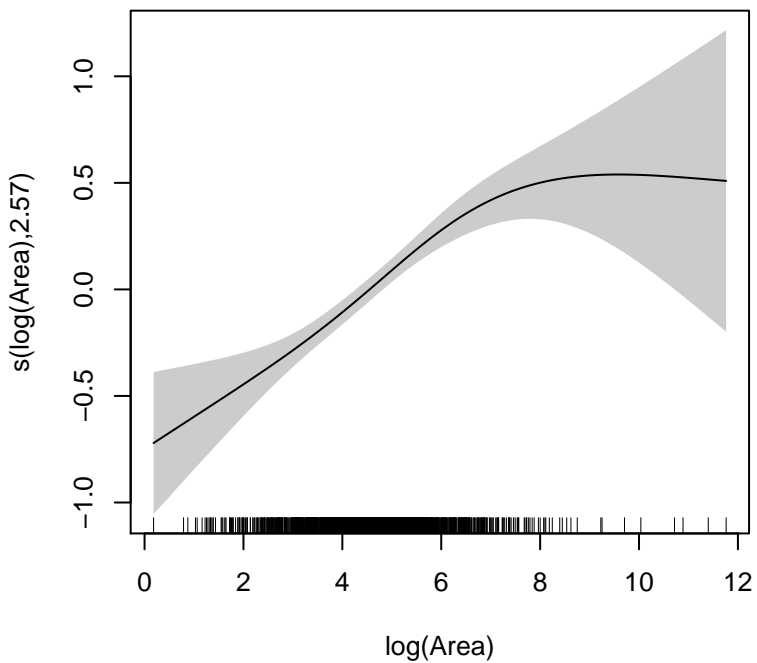**WTS**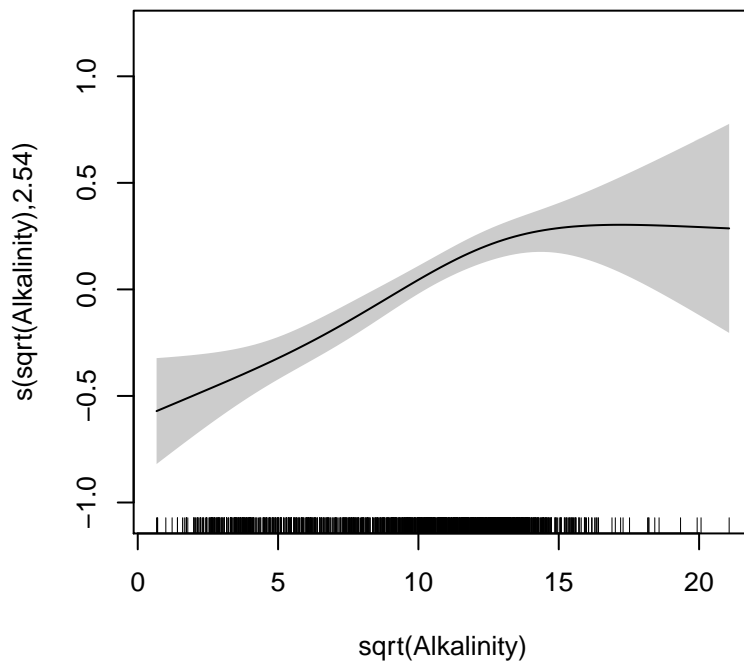



YEP

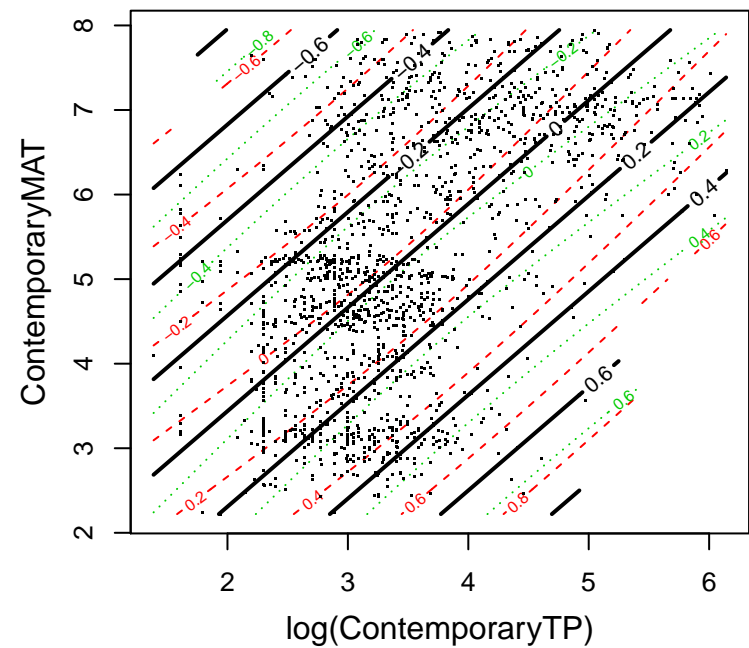

YEP

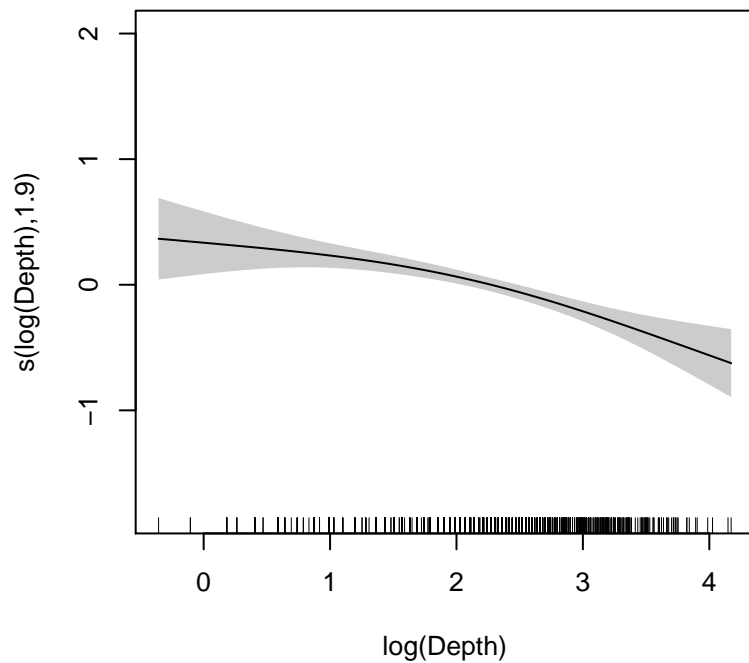

YEP

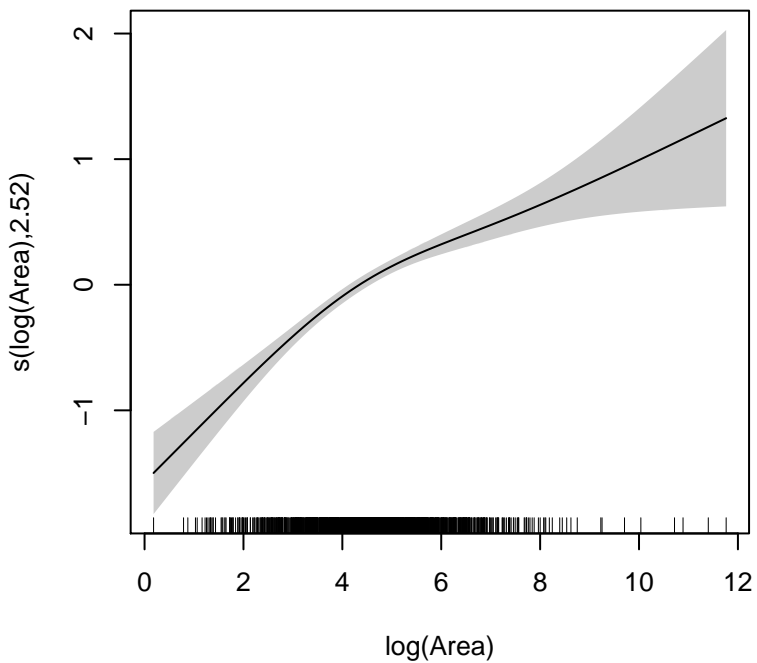

YEP

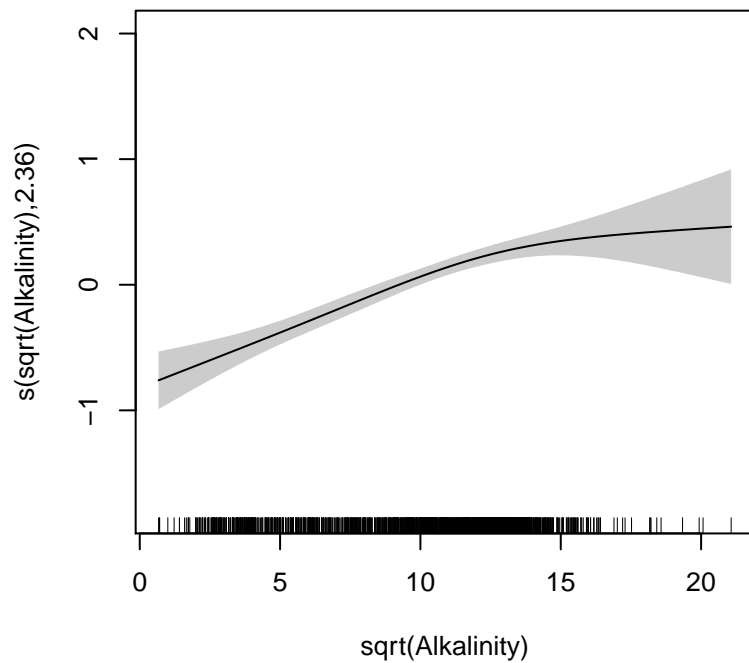

Supplement: pone.0182667.s003.pdf [file pone.0182667.s003.pdf]
